# Supplementary material for: Mycobacterial Populations Partly Change the Proportions of the Cells Undergoing Asymmetric/Symmetric Divisions in Response to Glycerol Levels in Growth Medium
Source: MDPI journal article supplement (doi:10.3390/cells10051160), 2021-05-11
Supplement: s1 [file s1]

## Supplementary Material

### **Mycobacterial populations partly change the proportions of the cells undergoing asymmetric/symmetric divisions in response to glycerol levels in the growth medium**

Atul Pradhan, Nagaraja Mukkayyan, Kishor Jakkala, and Parthasarathi Ajitkumar

Department of Microbiology and Cell Biology, Indian Institute of Science, Bengaluru, Karnataka, India

**Supplementary Materials:** The Supplementary Materials contain **Figures S1-S6, Schemes S1-S7, Tables S1-S5**. **Figure S1:** Standard calibration curve for different glycerol concentrations. **Figure S2:** Percentage error in the measurement of three different *Msm* cells. **Figure S3:** Proportion of the cells undergoing ACD/SCD after addition of 1X Middlebrook 7H9 and 10X Middlebrook 7H9 every 3 hr from 0.1% glycerol concentration. **Figure S4:** Growth profiles of *MSMEG\_2932\_KO\_pMV306-VC* and *MSMEG\_2932\_KO\_pMV306-MSMEG\_2932*, with respect to glycerol levels in the medium, and the proportion of the cells undergoing ACD/SCD. **Figure S5:** Growth profiles of *MSMEG\_2933\_KO\_pMV306-VC* and *MSMEG\_2933\_KO\_pMV306-MSMEG\_2933*, with respect to the glycerol levels in the medium, and the proportion of the cells undergoing ACD/SCD. **Figure S6:** Growth profiles of *MSMEG\_2936\_KO\_pMV306-VC* and *MSMEG\_2936\_KO\_pMV306-MSMEG\_2936*, with respect to glycerol levels in the medium, and the proportion of the cells undergoing ACD/SCD. **Scheme S1:** *Msm* cell harvesting, fixation, DIC imaging and data acquisition for measuring proportion of ACD and SCD. **Scheme S2:** Gene knockout

strategy. **Scheme S3:** *Msm MSMEG\_2932*-KO clone confirmation using PCR and genomic DNA. **Scheme S4:** *MSMEG\_2933* gene knockout strategy. **Scheme S5:** *Msm MSMEG\_2933*-KO clone confirmation using PCR and genomic DNA. **Scheme S6:** *MSMEG\_2936* gene knockout strategy. **Scheme S7:** *Msm MSMEG\_2936*-KO clone confirmation using PCR and genomic DNA. **Table S1:** Bacterial strains and plasmids with Supplementary references. **Table S2:** Oligonucleotide primers used for cDNA synthesis and real time PCR. **Table S3:** Oligonucleotide primers used for the gene replacement of *MSMEG\_2932*, *MSMEG\_2933*, and *MSMEG\_2936* with *res-hyg<sup>R</sup>*-res and confirmation. **Table S4:** Coefficient of variation (CV), a measure of the dispersion in the location of the site of constriction from the mid-cell site. **Table S5:** Oligonucleotide primers used for the genome integrant complement generation of knock-out strains of *MSMEG\_2932* KO, *MSMEG\_2933* KO, and *MSMEG\_2936* KO.

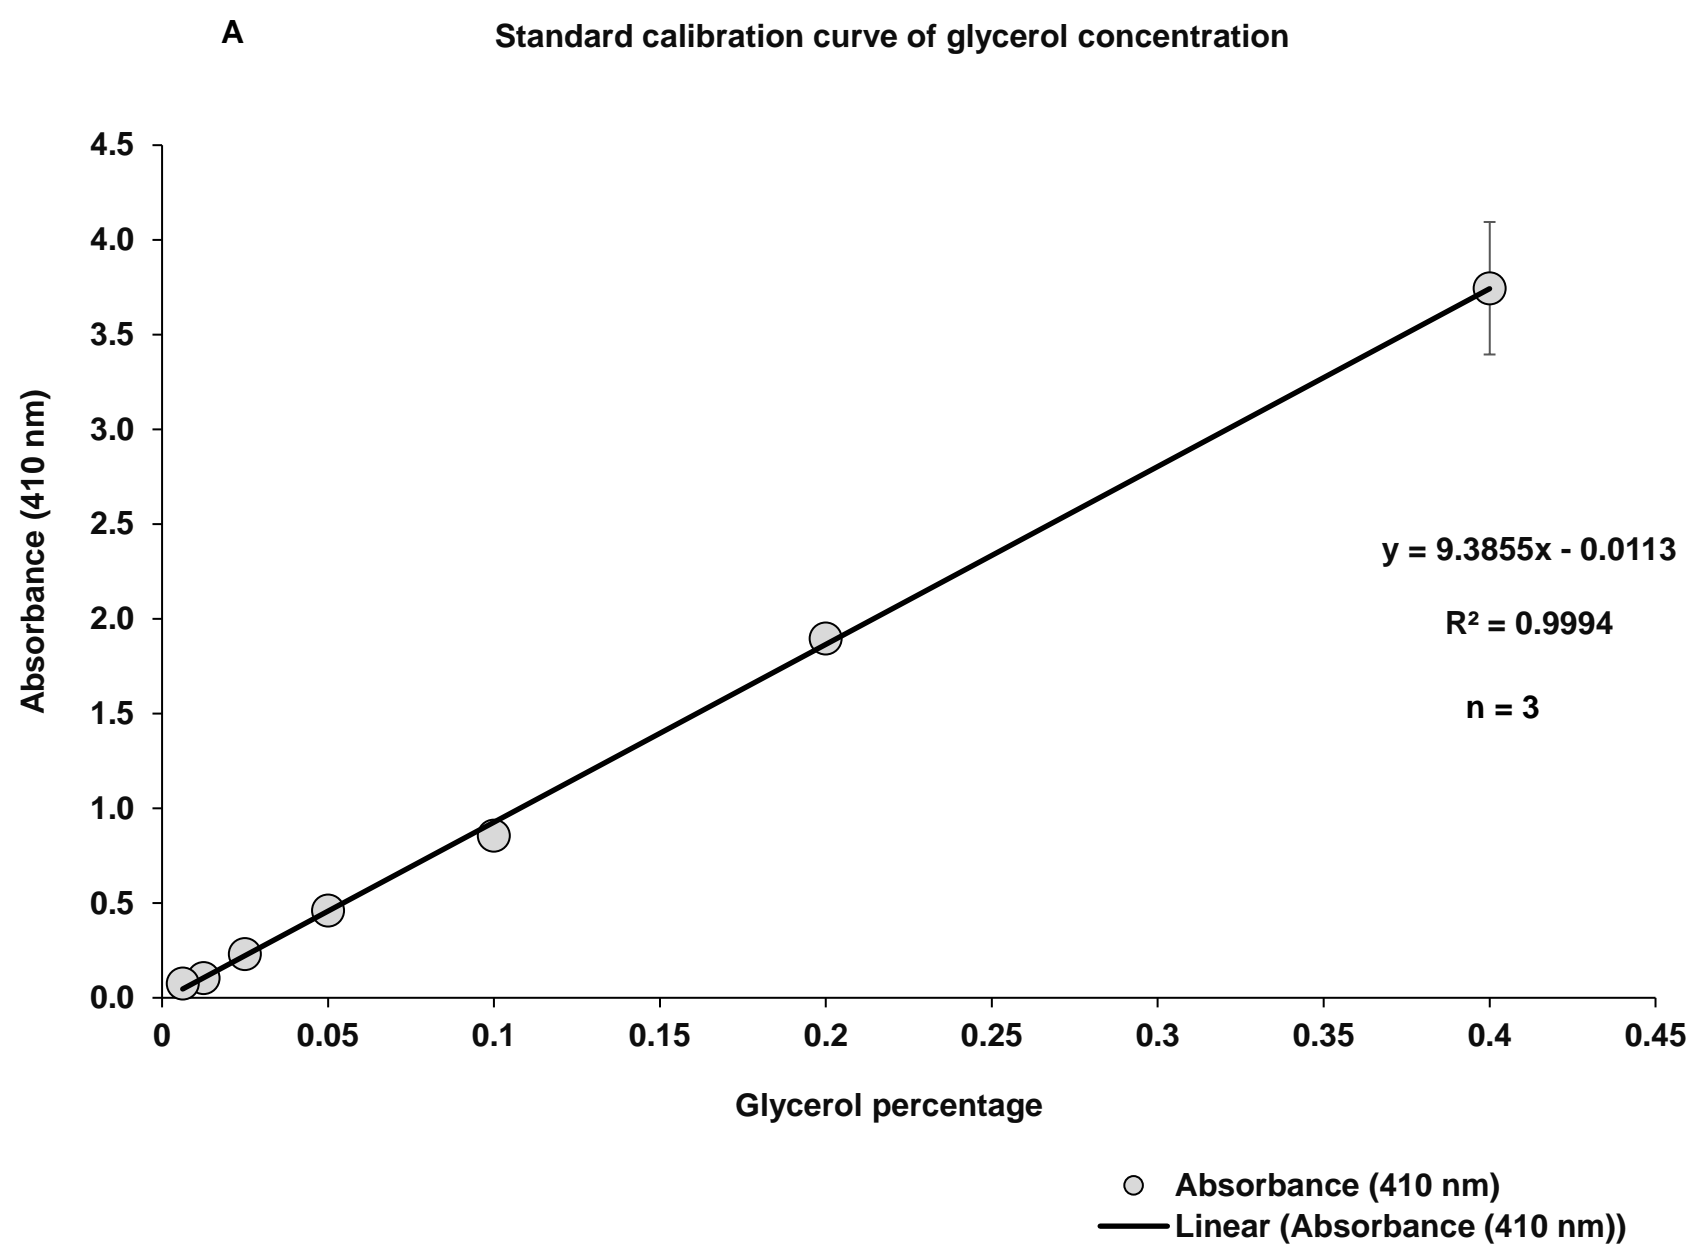

**B** Glycerol concentrations used for constructing calibration curve

| Glycerol Percentage | Absorbance (410 nm) | SD   |
|---------------------|---------------------|------|
| 0.4                 | 3.74                | 0.35 |
| 0.2                 | 1.90                | 0.07 |
| 0.1                 | 0.86                | 0.02 |
| 0.05                | 0.46                | 0.04 |
| 0.025               | 0.23                | 0.04 |
| 0.0125              | 0.10                | 0.06 |
| 0.00625             | 0.08                | 0.03 |

**Figure S1.** Standard calibration curve for different glycerol concentrations. **(A)** Standard calibration curve. **(B)** Glycerol concentration used for the construction of the calibration curve.

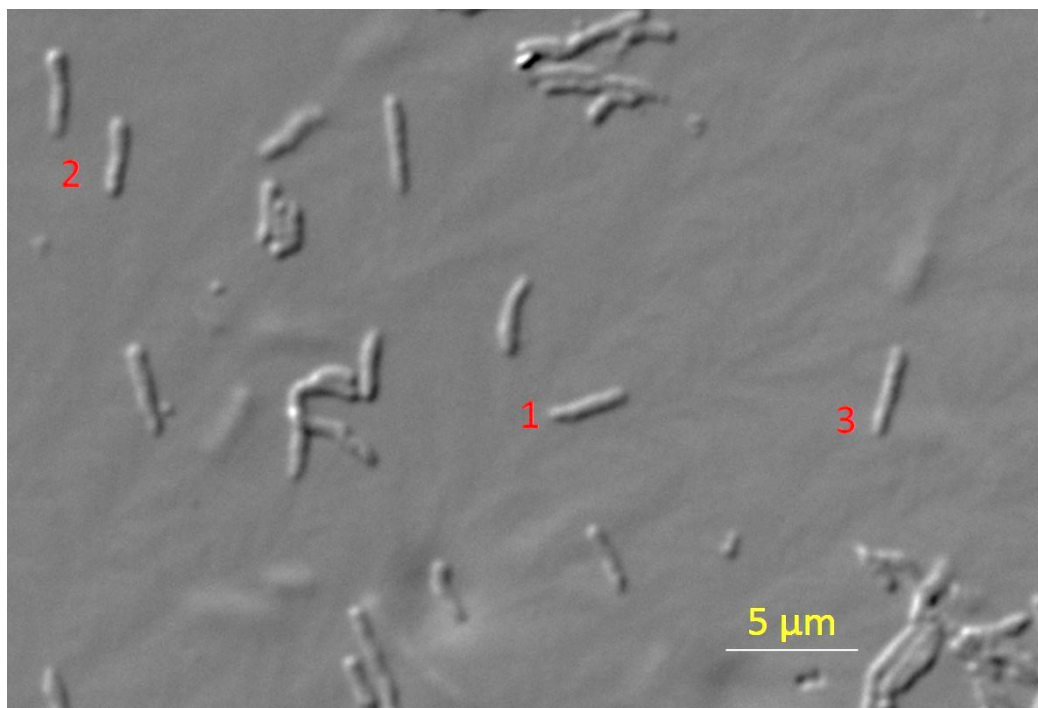

n = 20  
N=3

| 1                |          |                    |       | 2                |          |                    |       | 3                |          |                    |       |
|------------------|----------|--------------------|-------|------------------|----------|--------------------|-------|------------------|----------|--------------------|-------|
| n                | Measured | Average - measured | error | n                | Measured | Average - measured | error | n                | Measured | Average - measured | error |
| 1                | 2.92     | 0.07               | 0.07  | 1                | 2.98     | 0.06               | 0.06  | 1                | 3.36     | 0.08               | 0.08  |
| 2                | 2.93     | 0.06               | 0.06  | 2                | 2.99     | 0.06               | 0.06  | 2                | 3.39     | 0.05               | 0.05  |
| 3                | 2.95     | 0.05               | 0.05  | 3                | 2.99     | 0.06               | 0.06  | 3                | 3.40     | 0.04               | 0.04  |
| 4                | 2.95     | 0.05               | 0.05  | 4                | 3.00     | 0.05               | 0.05  | 4                | 3.40     | 0.04               | 0.04  |
| 5                | 2.96     | 0.04               | 0.04  | 5                | 3.01     | 0.04               | 0.04  | 5                | 3.41     | 0.03               | 0.03  |
| 6                | 2.97     | 0.03               | 0.03  | 6                | 3.02     | 0.03               | 0.03  | 6                | 3.41     | 0.03               | 0.03  |
| 7                | 2.97     | 0.02               | 0.02  | 7                | 3.02     | 0.03               | 0.03  | 7                | 3.42     | 0.02               | 0.02  |
| 8                | 2.97     | 0.02               | 0.02  | 8                | 3.03     | 0.02               | 0.02  | 8                | 3.42     | 0.02               | 0.02  |
| 9                | 2.98     | 0.02               | 0.02  | 9                | 3.04     | 0.01               | 0.01  | 9                | 3.43     | 0.02               | 0.02  |
| 10               | 2.98     | 0.02               | 0.02  | 10               | 3.05     | 0.00               | 0.00  | 10               | 3.44     | 0.00               | 0.00  |
| 11               | 2.98     | 0.01               | 0.01  | 11               | 3.05     | 0.00               | 0.02  | 11               | 3.45     | -0.01              | 0.01  |
| 12               | 2.99     | 0.01               | 0.01  | 12               | 3.06     | -0.02              | 0.02  | 12               | 3.46     | -0.02              | 0.02  |
| 13               | 3.01     | -0.01              | 0.01  | 13               | 3.07     | -0.02              | 0.03  | 13               | 3.46     | -0.02              | 0.02  |
| 14               | 3.02     | -0.02              | 0.02  | 14               | 3.08     | -0.03              | 0.04  | 14               | 3.47     | -0.03              | 0.03  |
| 15               | 3.04     | -0.04              | 0.04  | 15               | 3.08     | -0.04              | 0.04  | 15               | 3.47     | -0.03              | 0.03  |
| 16               | 3.04     | -0.04              | 0.04  | 16               | 3.08     | -0.04              | 0.05  | 16               | 3.48     | -0.04              | 0.04  |
| 17               | 3.07     | -0.07              | 0.07  | 17               | 3.10     | -0.05              | 0.05  | 17               | 3.48     | -0.04              | 0.04  |
| 18               | 3.07     | -0.07              | 0.07  | 18               | 3.10     | -0.05              | 0.06  | 18               | 3.49     | -0.05              | 0.05  |
| 19               | 3.07     | -0.07              | 0.07  | 19               | 3.11     | -0.06              | 0.07  | 19               | 3.49     | -0.05              | 0.05  |
| 20               | 3.08     | -0.09              | 0.09  | 20               | 3.12     | -0.07              | 0.00  | 20               | 3.49     | -0.05              | 0.05  |
| Average          | 2.99     |                    | 0.04  | Average          | 3.04     |                    | 0.04  | Average          | 3.44     |                    | 0.03  |
| Relative error   | 0.01     |                    |       | Relative error   | 0.01     |                    |       | Relative error   | 0.01     |                    |       |
| Percentage error | 1.37     |                    |       | Percentage error | 1.20     |                    |       | Percentage error | 0.9      |                    |       |

Error = Average of cell size – measured cell size values of individual cell

$$\text{Relative error} = \frac{\text{Average of error}}{\text{Average of cell size measured}}$$

|                         | 1    | 2    | 3    |
|-------------------------|------|------|------|
| <b>Average</b>          | 2.99 | 3.04 | 3.44 |
| <b>Relative error</b>   | 0.01 | 0.01 | 0.01 |
| <b>Percentage error</b> | 1.37 | 1.20 | 0.9  |

**Figure S2.** Percentage error in the measurement of three different *Msm* cells.

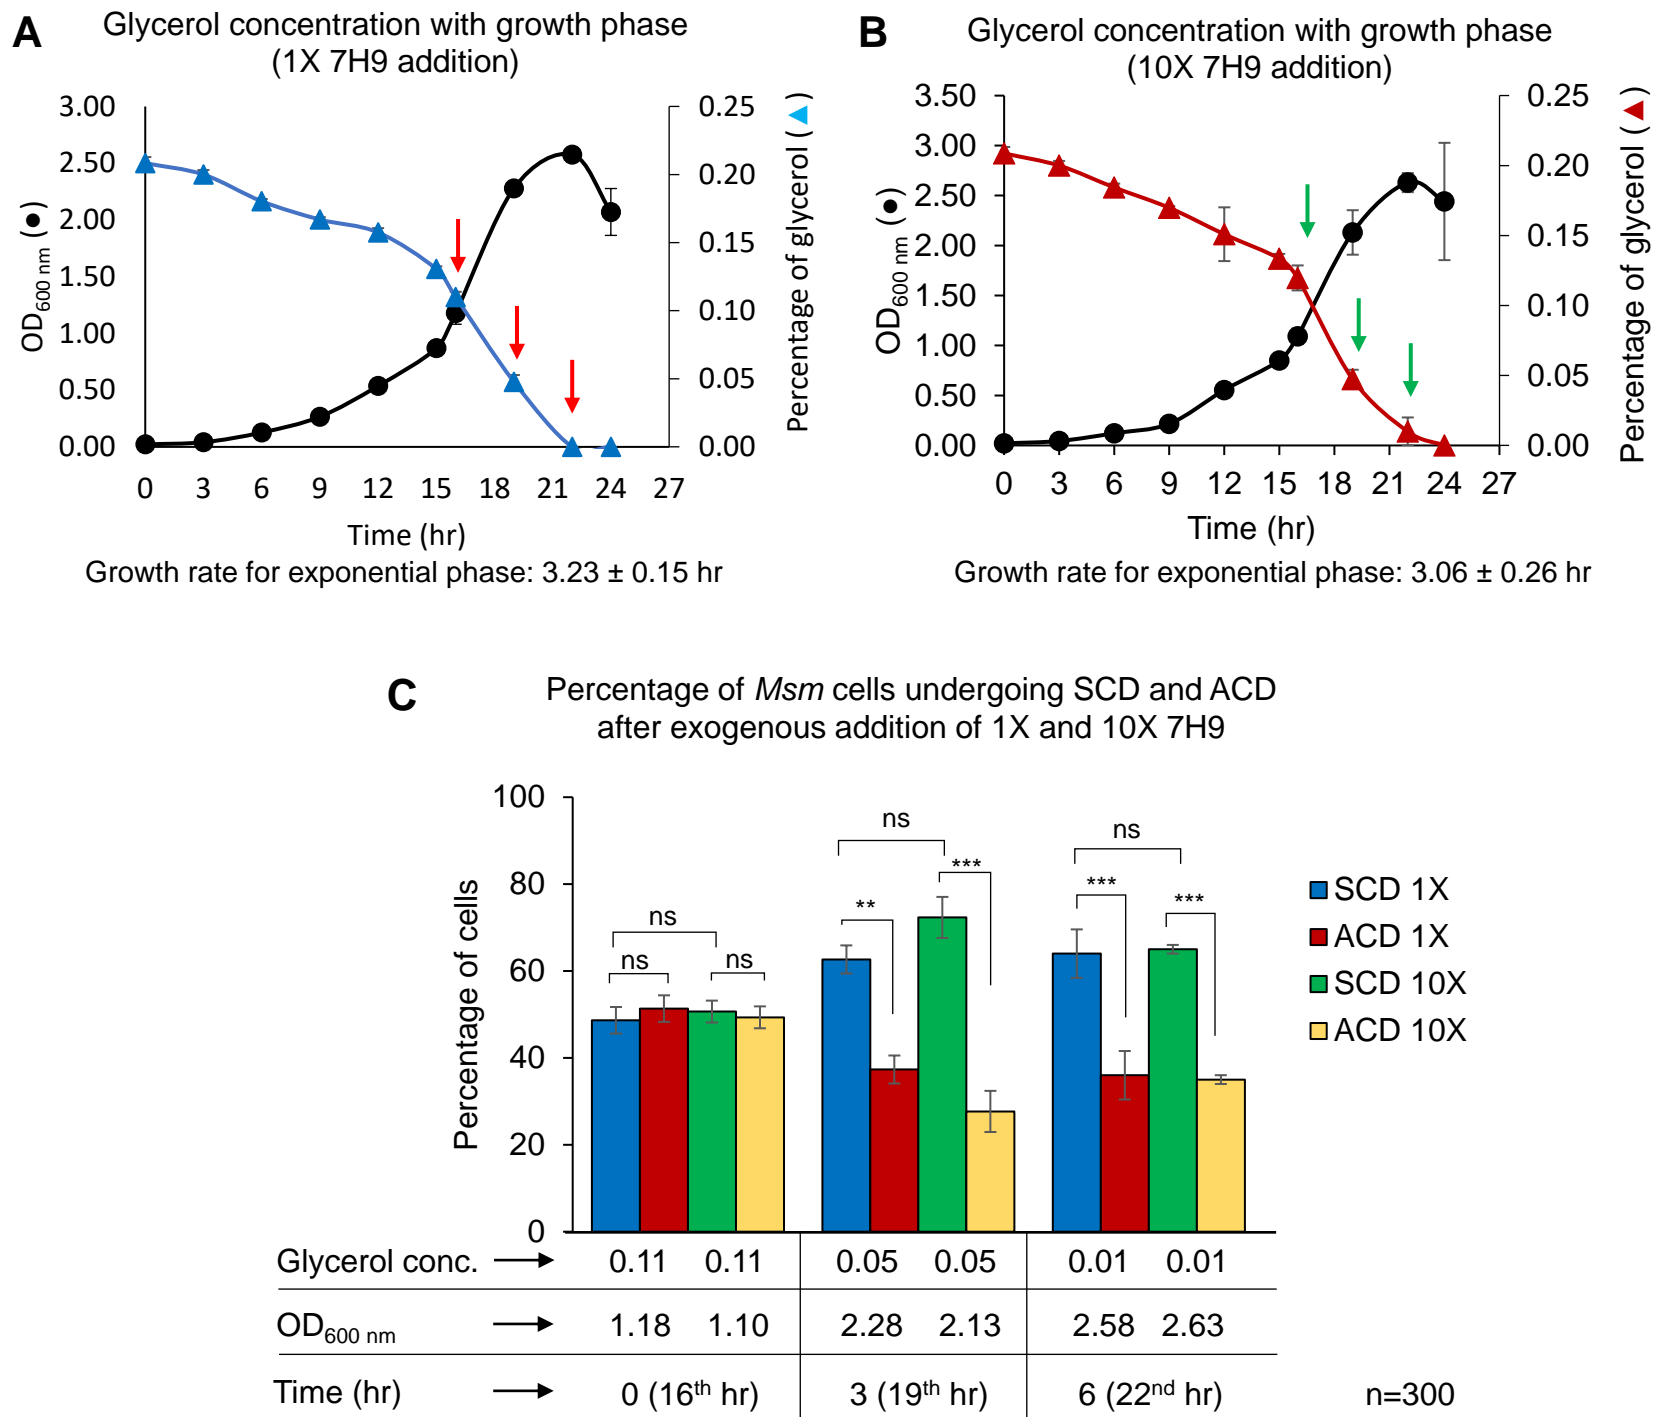

**Figure S3. Proportion of the cells undergoing ACD/SCD after addition of 1X Middlebrook 7H9 and 10X Middlebrook 7H9 every 3 hr from 0.1% glycerol concentration.** (●) Growth curve of *Msm* cells cultured in Middlebrook 7H9 liquid medium containing 0.2% glycerol and 0.05% Tween 80, with respect to (▲) glycerol concentration after the exogenous addition of (A) 0.05% of 1X 7H9 and (B) 0.05% of 10X 7H9, at 16<sup>th</sup>, 19<sup>th</sup> and 22<sup>nd</sup> hrs, as indicated by the red and green arrows, respectively. (C) OD, glycerol concentration and proportion of SCD (blue and green bar) and ACD (red and yellow bar) after the exogenous addition of 0.05% 1X and 10X 7H9 at 0 hr, 3<sup>rd</sup> hr and 6<sup>th</sup> hr. (n = 300. The data shown are for biological triplicates and represented with mean values  $\pm$  s.d.  $p < 0.01$  \*\*,  $p < 0.001$  \*\*\*, ns – no significance via two-tailed t-test).

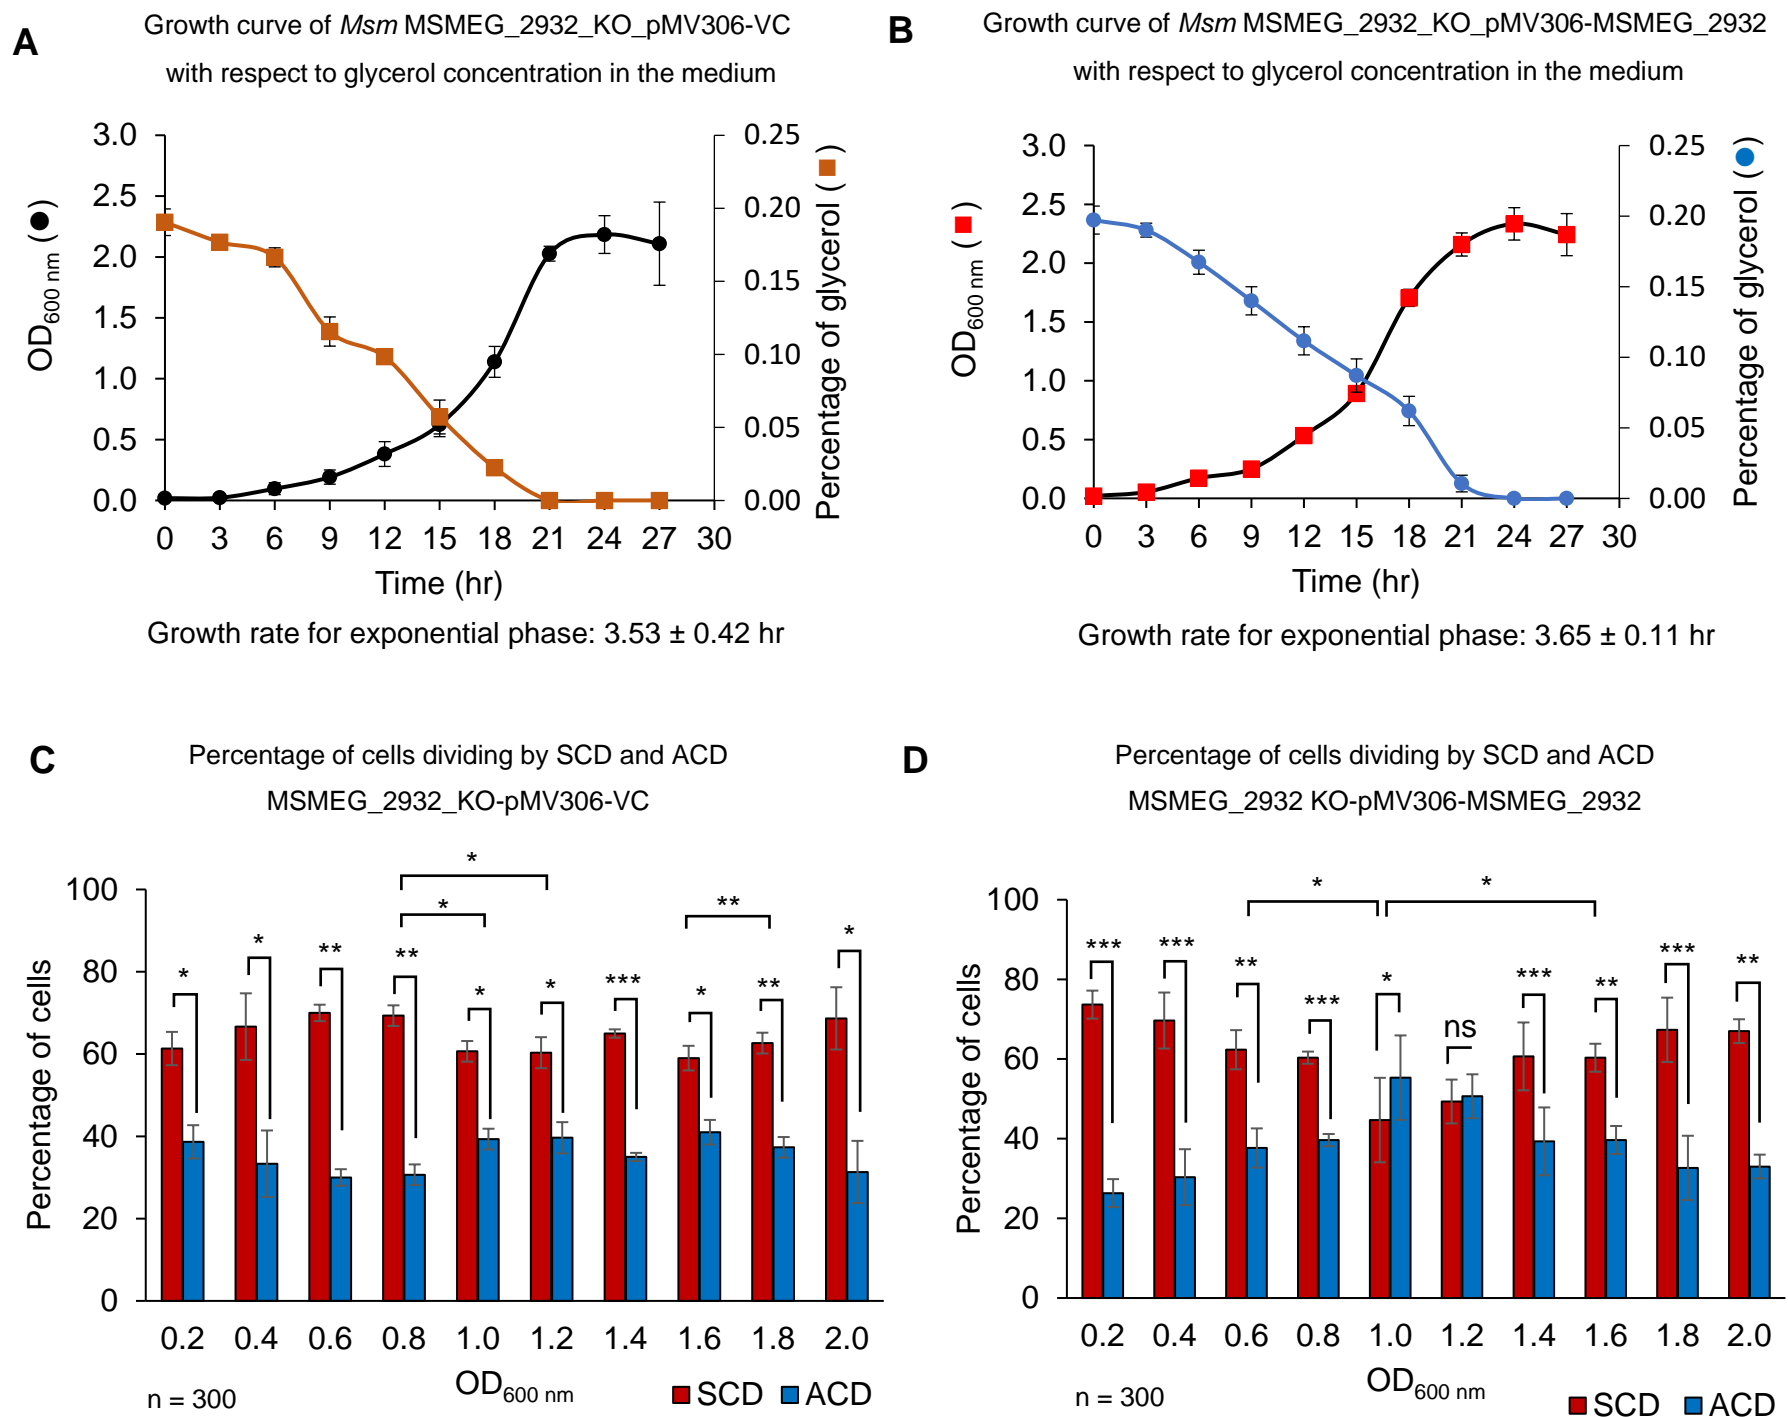

**Figure S4. Growth profiles of *MSMEG\_2932\_KO\_pMV306-VC* and *MSMEG\_2932\_KO\_pMV306-MSMEG\_2932*, with respect to glycerol levels in the medium, and the proportion of the cells undergoing ACD/SCD.** (A) Growth curve of *Msm* MSMEG\_2932\_KO\_pMV306-VC (●) with respect to the free glycerol levels in the medium (■). (B) Growth curve of *Msm* MSMEG\_2932\_KO\_pMV306-MSMEG\_2932 (■) with respect to the free glycerol levels in the medium (●). (C) Bar graph for the percentage of cells dividing by SCD (red bar) and ACD (blue bar) of *Msm* MSMEG\_2932\_KO\_pMV306-VC at different OD<sub>600 nm</sub> values. (D) Bar graph for the percentage of cells dividing by SCD (red bar) and ACD (blue bar) of *Msm* MSMEG\_2932\_KO\_pMV306-MSMEG\_2932 at different OD<sub>600 nm</sub> values. The data shown are from biological triplicates and represented with mean values  $\pm$  s.d. ( $p < 0.05^*$ ,  $p < 0.01^{**}$ ,  $p < 0.001^{***}$ , ns – no significance via two-tailed t-test).

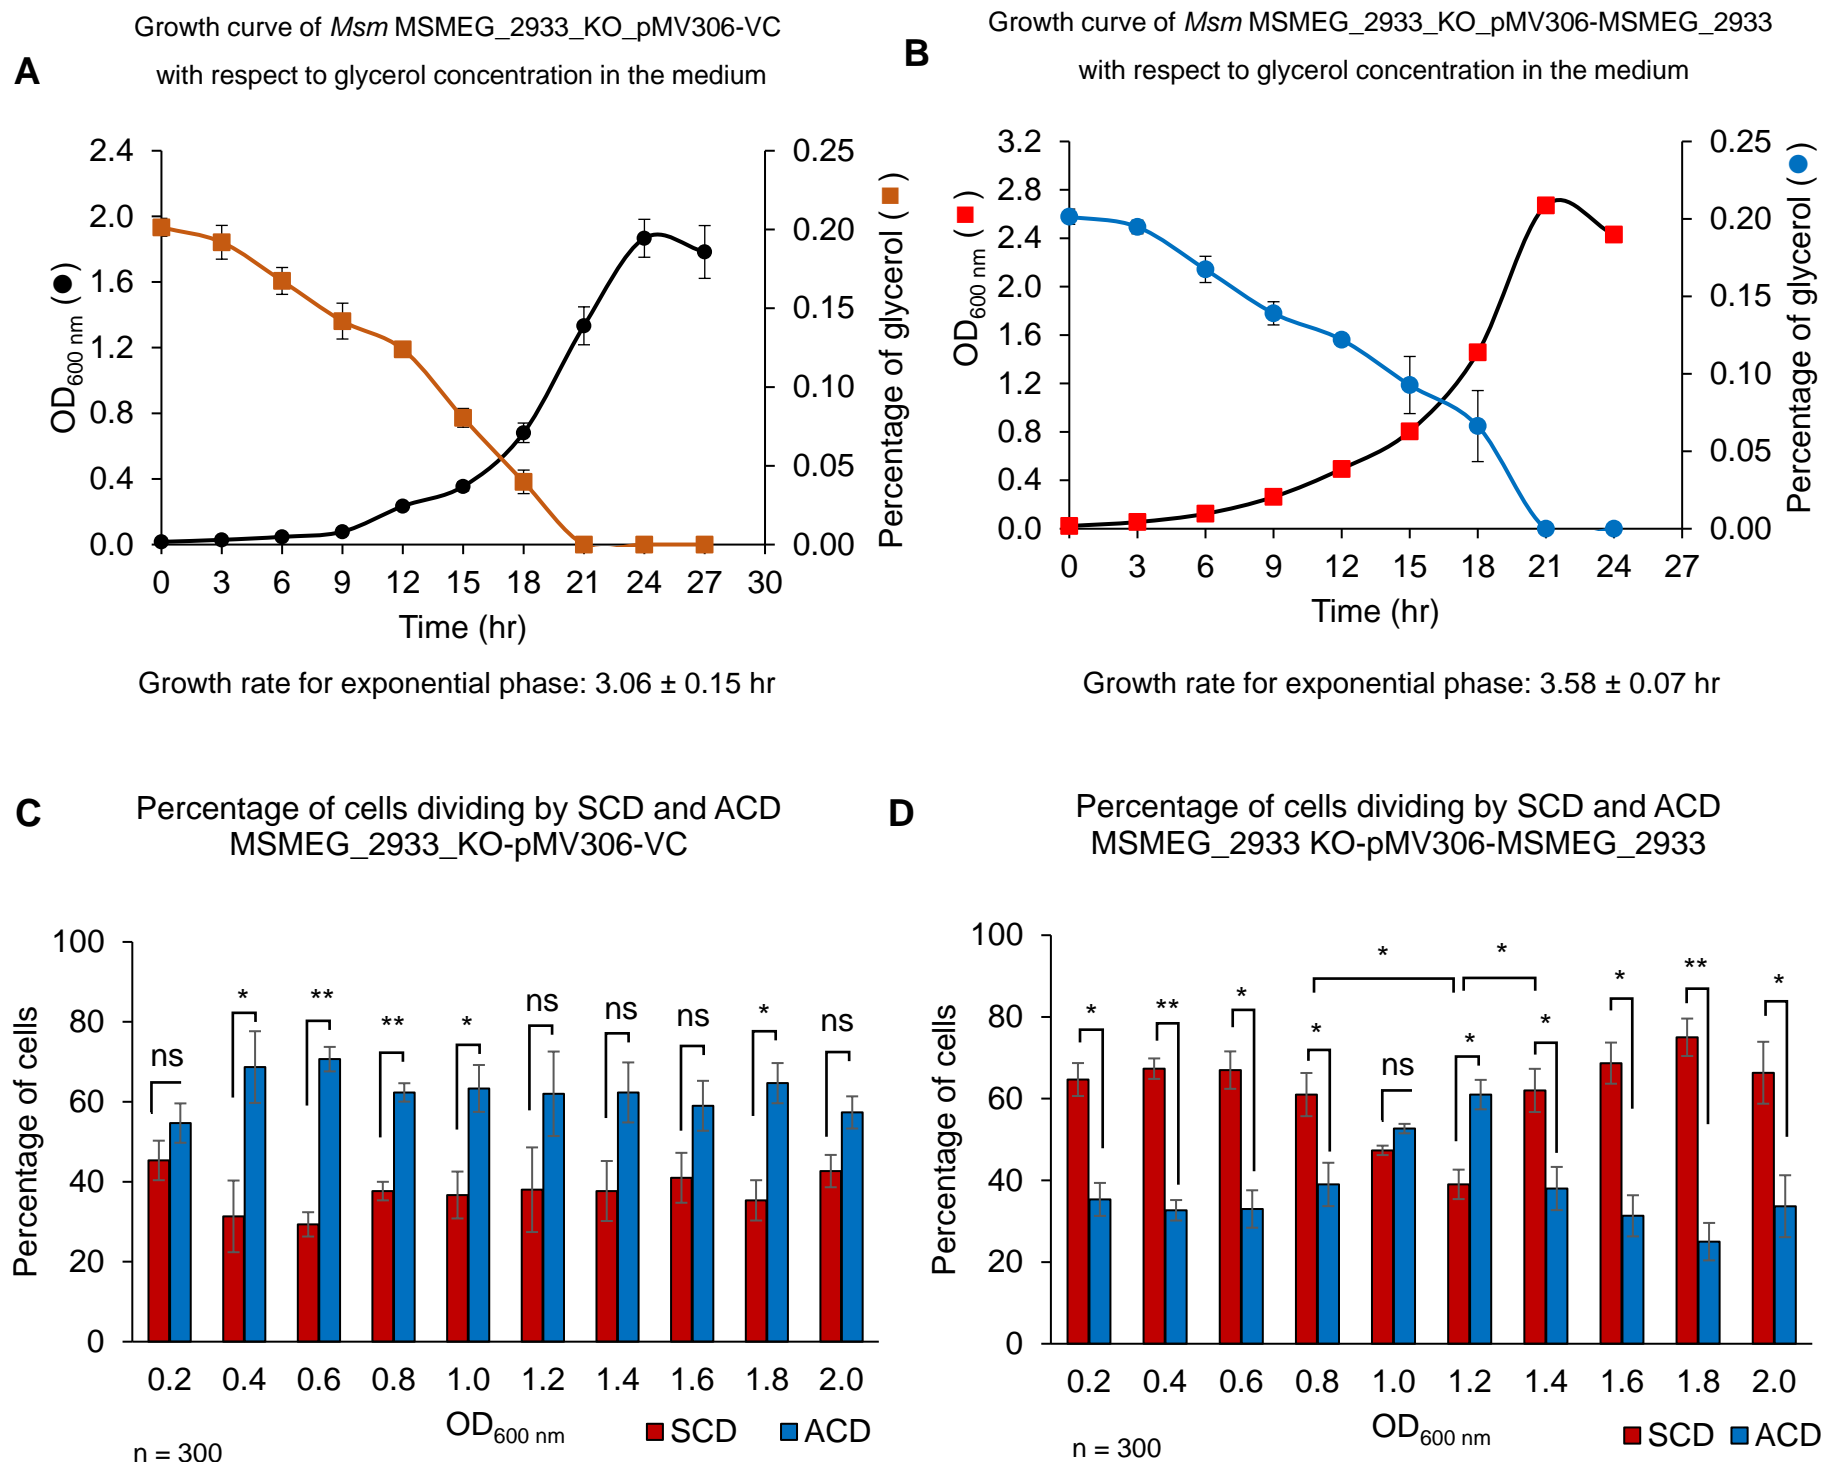

**Figure S5. Growth profiles of *MSMEG\_2933\_KO\_pMV306-VC* and *MSMEG\_2933\_KO\_pMV306-MSMEG\_2933*, with respect to glycerol levels in the medium, and the proportion of the cells undergoing ACD/SCD. (A)** Growth curve of *Msm* MSMEG\_2933\_KO\_pMV306-VC (●) with respect to the free glycerol levels in the medium (■). **(B)** Growth curve of *Msm* MSMEG\_2933\_KO\_pMV306-MSMEG\_2933 (■) with respect to the free glycerol levels in the medium (●). **(C)** Bar graph for the percentage of cells dividing by SCD (red bar) and ACD (blue bar) of *Msm* MSMEG\_2933\_KO\_pMV306-VC at different OD<sub>600 nm</sub> values. **(D)** Bar graph for the percentage of cells dividing by SCD (red bar) and ACD (blue bar) of *Msm* MSMEG\_2933\_KO\_pMV306-MSMEG\_2933 at different OD<sub>600 nm</sub> values. The data shown are from biological triplicates and represented with mean values ± s.d. (p < 0.05\*, p < 0.01\*\*, ns – no significance via two-tailed t-test).

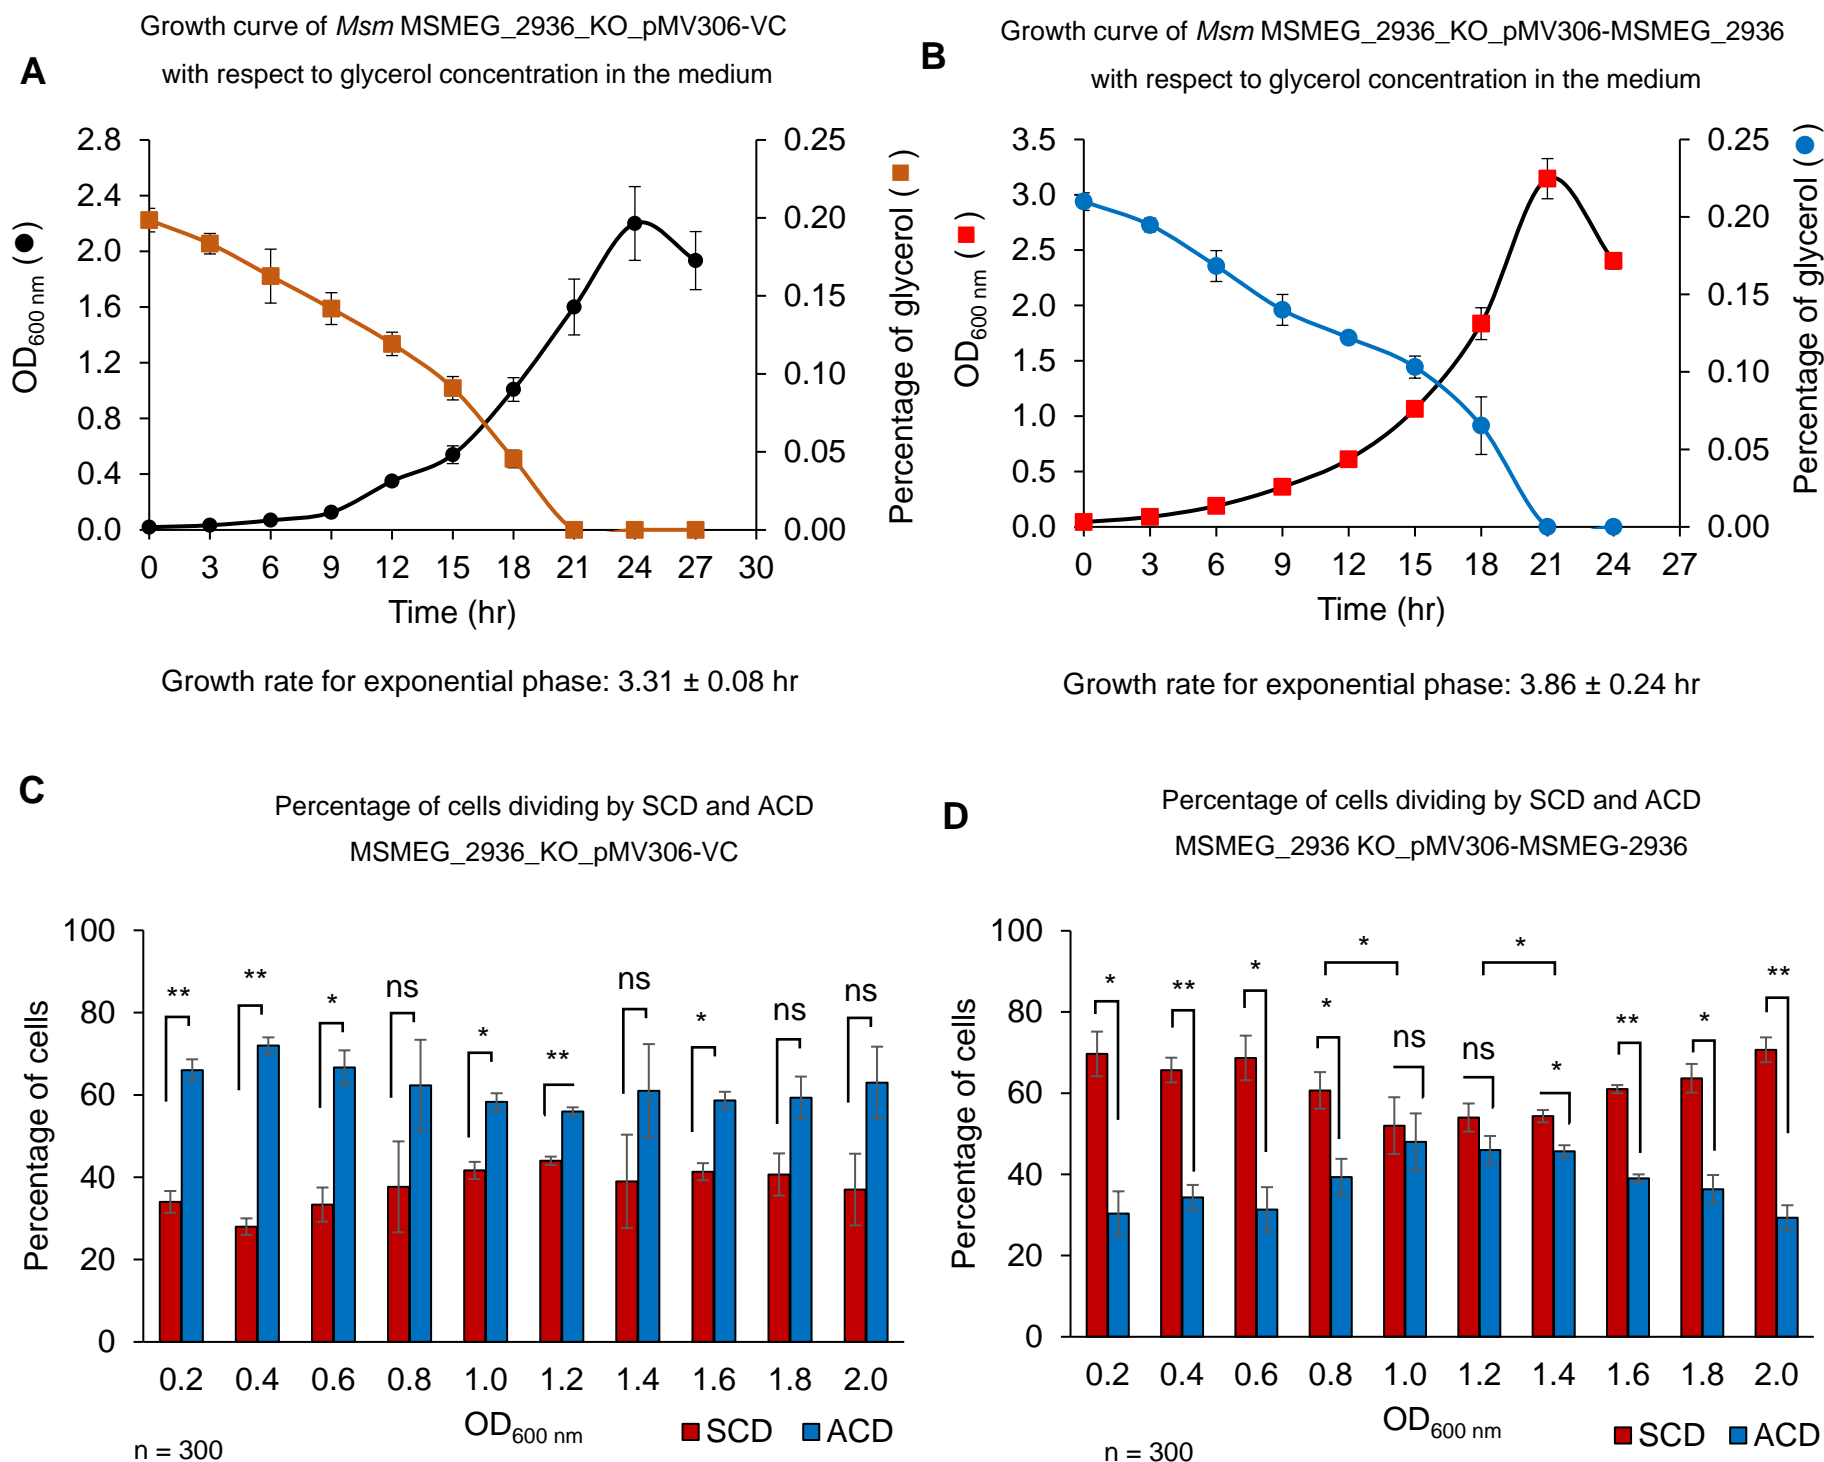

**Figure S6. Growth profiles of *MSMEG\_2936\_KO\_pMV306-VC* and *MSMEG\_2936\_KO\_pMV306-MSMEG\_2936*, with respect to glycerol levels in the medium, and the proportion of the cells undergoing ACD/SCD. (A)** Growth curve of *Msm* MSMEG\_2936\_KO\_pMV306-VC (●) with respect to the free glycerol levels in the medium (■). **(B)** Growth curve of *Msm* MSMEG\_2936\_KO\_pMV306-MSMEG\_2936 (■) with respect to the free glycerol levels in the medium (●). **(C)** Bar graph for the percentage of cells dividing by SCD (red bar) and ACD (blue bar) of *Msm* MSMEG\_2936\_KO\_pMV306-VC at different OD<sub>600 nm</sub> values. **(D)** Bar graph for the percentage of cells dividing by SCD (red bar) and ACD (blue bar) of *Msm* MSMEG\_2936\_KO\_pMV306-MSMEG\_2936 at different OD<sub>600 nm</sub> values. The data shown are from biological triplicates and represented with mean values  $\pm$  s.d. ( $p < 0.05^*$ ,  $p < 0.01^{**}$ , ns – no significance via two-tailed t-test).



## Scheme S1

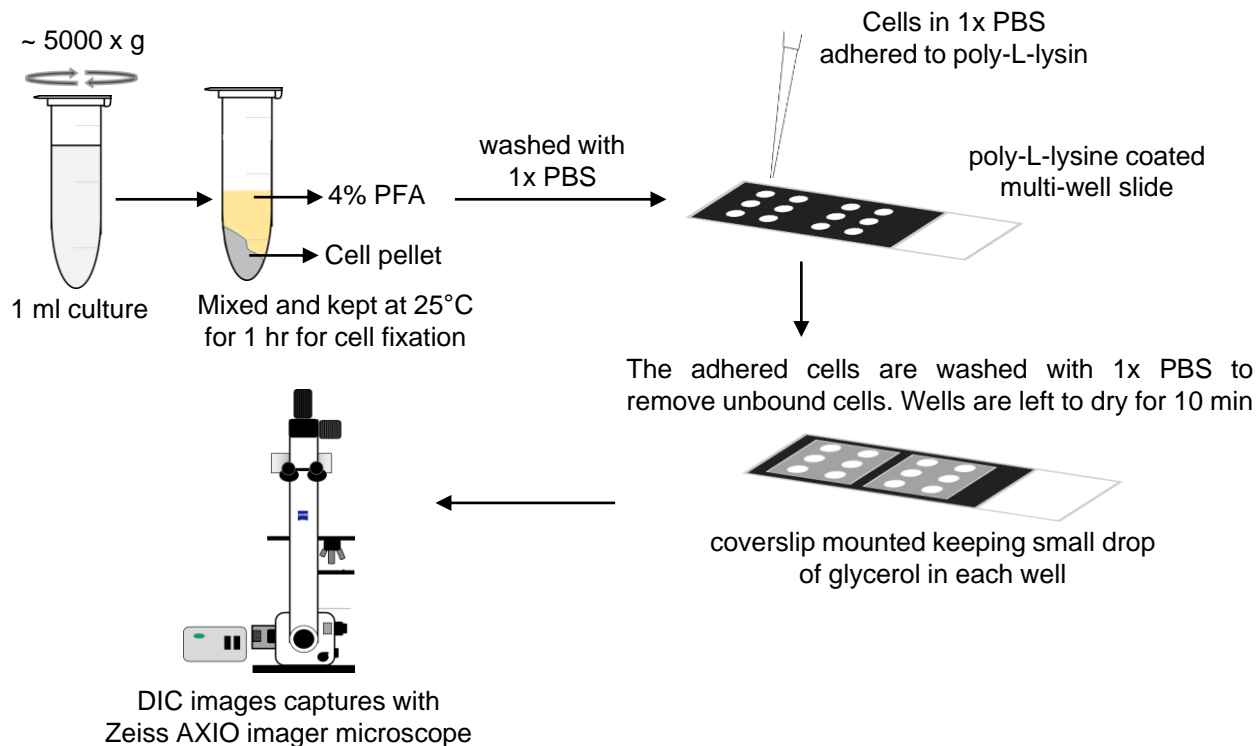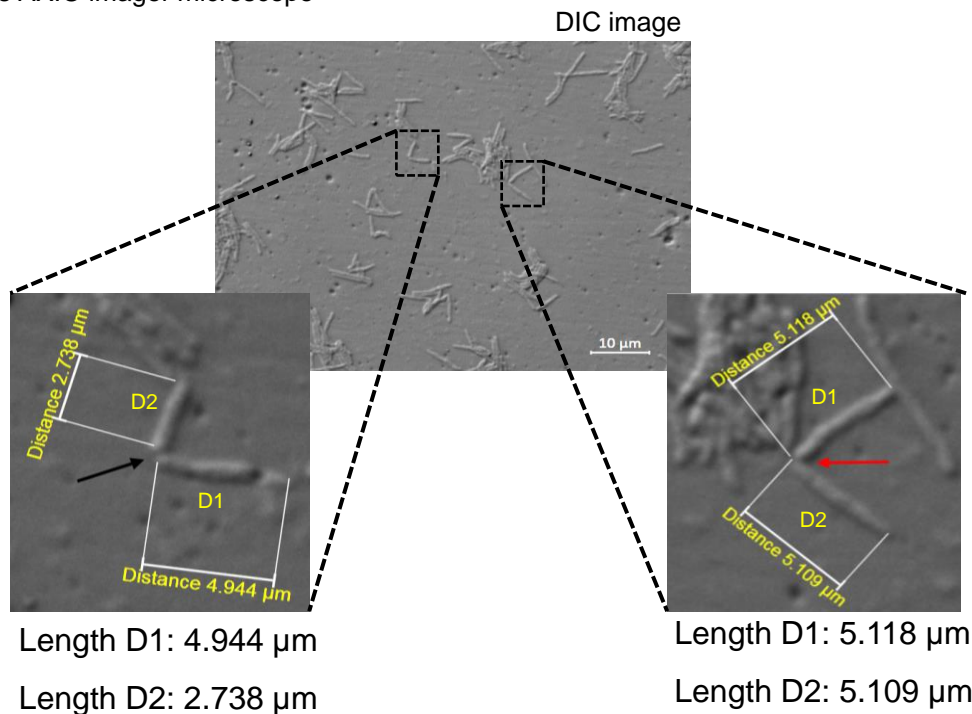

$$D1 + D2 = 7.682; D1 - D2 = 2.206$$

Percentage deviation from mid-cell site

$$= 100 \times (D1 - D2 / D1 + D2)$$

$$= 100 \times (2.206 / 7.682) = 28.71$$

28.71 > 11%; ACD

$$D1 + D2 = 5.118; D1 - D2 = 5.109$$

Percentage deviation from mid-cell site

$$= 100 \times (D1 - D2 / D1 + D2)$$

$$= 100 \times (0.009 / 10.227) = 0.09$$

0.09 < 11%; SCD

**Scheme S1. *Msm* cell harvesting, fixation, DIC imaging and data acquisition for measuring the proportions of cells dividing by ACD and SCD.** One ml of *M. Smegmatis* cells harvested were pellet down at  $\sim 5000 \times g$  at  $4^{\circ}\text{C}$  for 10 min. Cell pellets were fixed in 4% paraformaldehyde (prepared in 1x PBS) for 1 hr of incubation at  $25^{\circ}\text{C}$ . After washing with 1x PBS, cells were then adhered to poly-L-lysine coated multi-well slides. After drying for  $\sim 10$  min, the unbound cells were washed-off using 1x PBS in each well. Glycerol (small drop) were kept in each well to mount the coverslip. The cells in each well were captured using Zeiss AXIO imager microscope. DIC images were analysed using ZEN software. Mother cells V-snapped or showing constriction during division. The length of sister-daughter cells in dividing mother cells were measured and percentage deviation from mid-cell site was calculated. The sister-daughter cells were named as D1 and D2, where  $D1 > D2$  in cell-length. Percentage deviation of  $\geq 11\%$  from mid-cell site were considered as ACD. Similarly, D1 and D2 differing in length by  $\leq 11\%$  deviation from mid-cell site, were considered as SCD. Black arrow shows asymmetric constriction during division (ACD) and red arrow shows symmetric constriction during division (SCD).

**Scheme S2. Gene knockout strategy and confirmation for *MSMEG\_2932*, *MSMEG\_2933*, and *MSMEG\_2936***

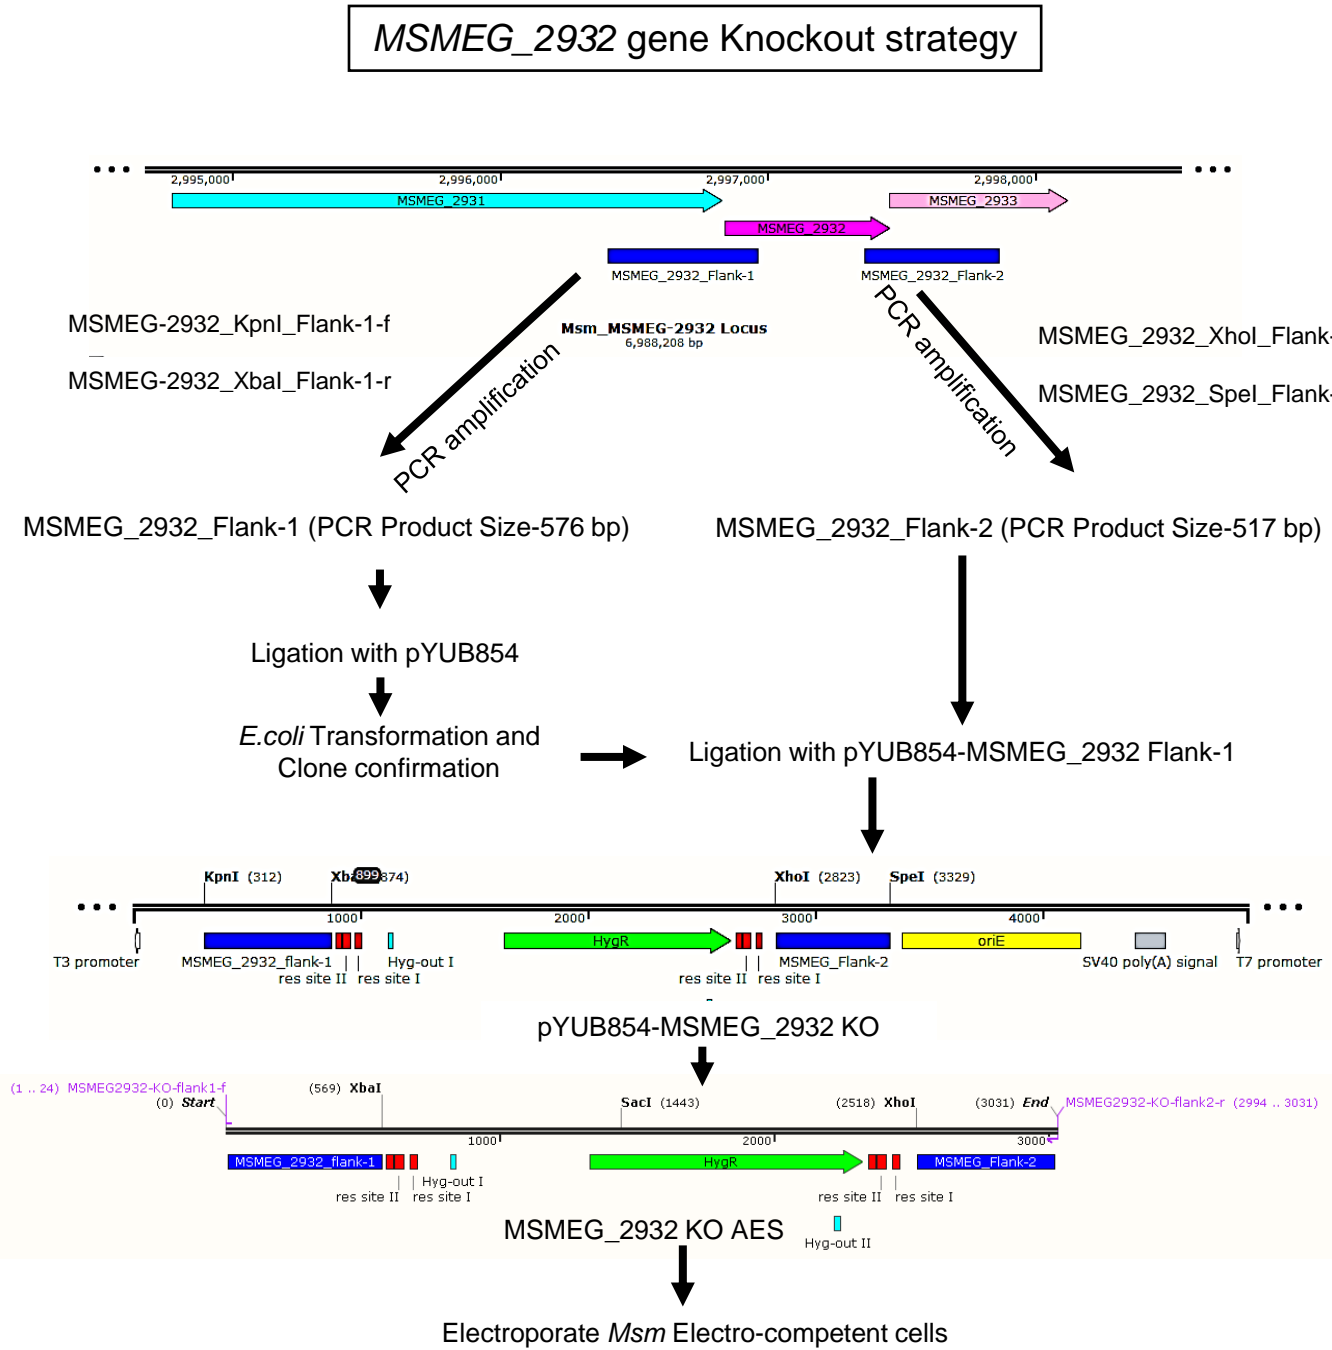

**Scheme S2. *MSMEG\_2932* gene Knockout strategy.** Cartoon depicts the strategy used for the *MSMEG\_2932* gene allelic replacement method.



## MSMEG\_2933 gene Knockout strategy

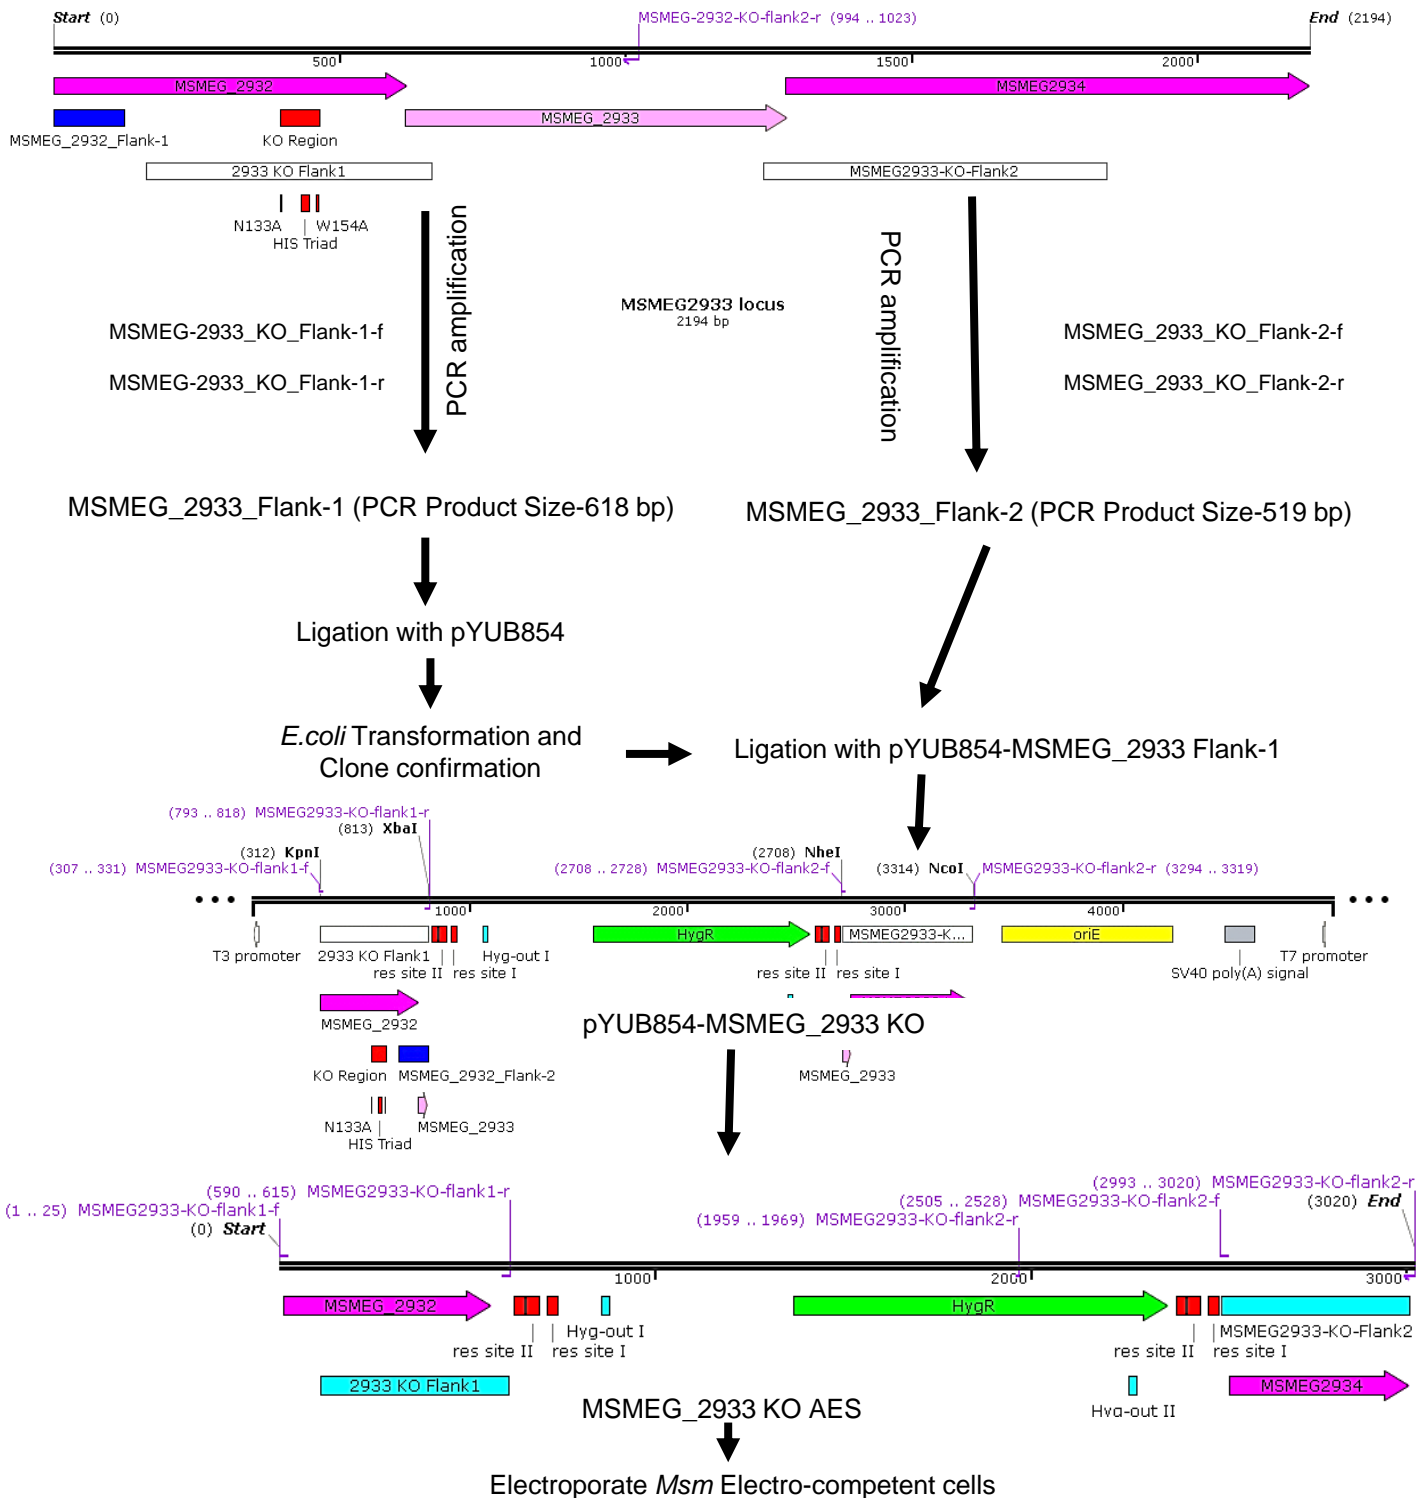

**Scheme S4. *MSMEG\_2933* gene knockout strategy.** Cartoon depicts the strategy used for the *MSMEG\_2933* gene allelic replacement method

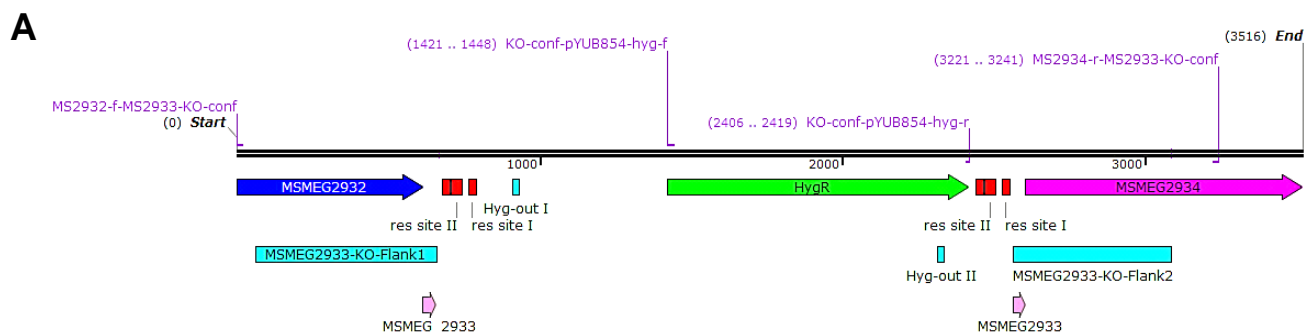

- B**
- |                            |   |                              |
|----------------------------|---|------------------------------|
| 1. Ms2932-f-Ms2933-KO-conf | } | 1. PCR Product Size- 2419 bp |
| 2. KO-conf-pYUB854-hyg-r   |   | 3. PCR Product Size- 999 bp  |
| 3. KO-conf-pYUB854-hyg-f   | } | 2. PCR Product Size- 1821 bp |
| 4. Ms2934-r-Ms2933-KO-conf |   | 4. PCR Product Size- 3033 bp |
| 5. MSMEG-2933_KO_Flank-1-f | } |                              |
| 6. MSMEG-2933_KO_Flank-2-r |   |                              |

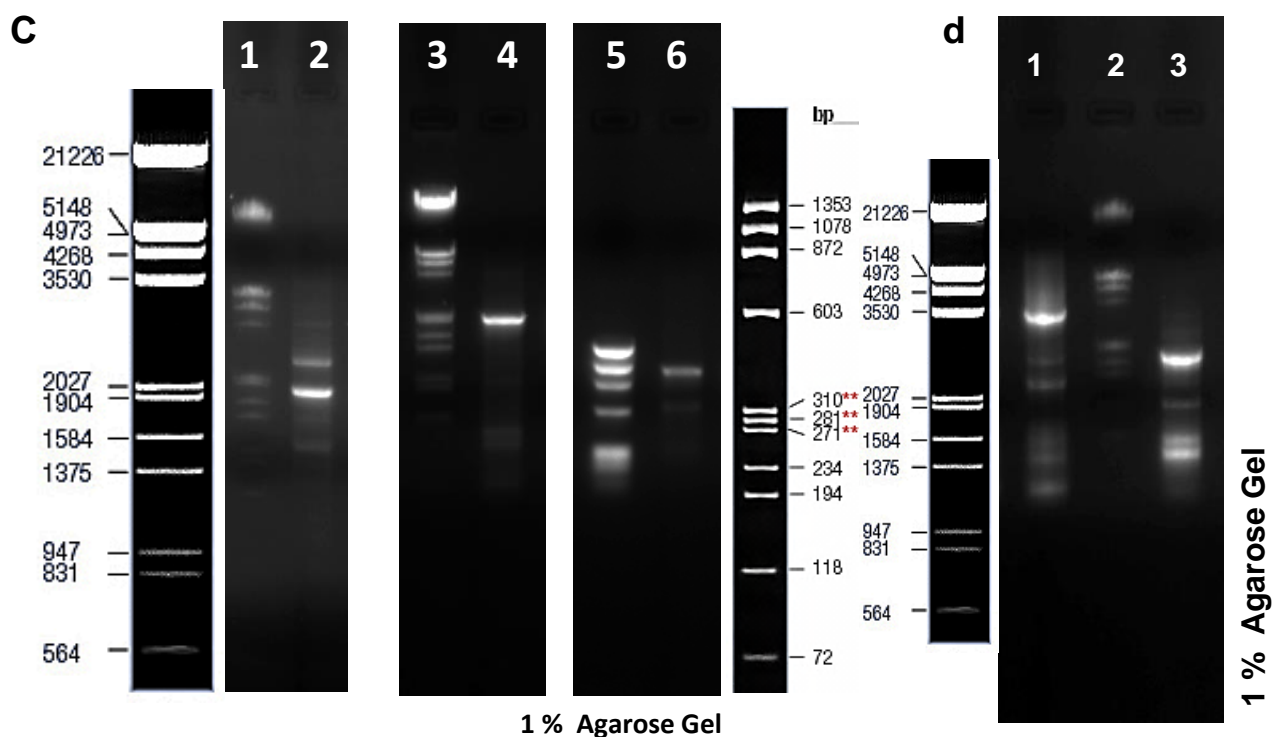

**Scheme S5. *Msm* MSMEG\_2933-KO clone confirmation using PCR and genomic DNA.** (A) Cartoon depicts the MSMEG\_2933 gene allelic exchange insert and its PCR Primers for clone confirmation. (B) Primers pairs and its respective PCR product details. (C) Agarose gel image showing the expected results. Lane-1 and 3 Lambda DNA EcoRI/HindIII-Marker-3, Lane 2 PCR Primer set 1, Lane 4 Primer set 2, Lane 6 Primer set 3, Lane 5  $\phi$ X174 DNA/BsuRI (HaeIII) ,Marker-9. (D) Agarose gel image for Primer set 4 Lane 1 PCR with *Msm* MSMEG\_2933 KO gDNA, Lane-2 Lambda DNA EcoRI/HindIII-Marker-3, Lane 3 PCR with *Msm* Wild type gDNA control.

## MSMEG\_2936 gene Knockout strategy

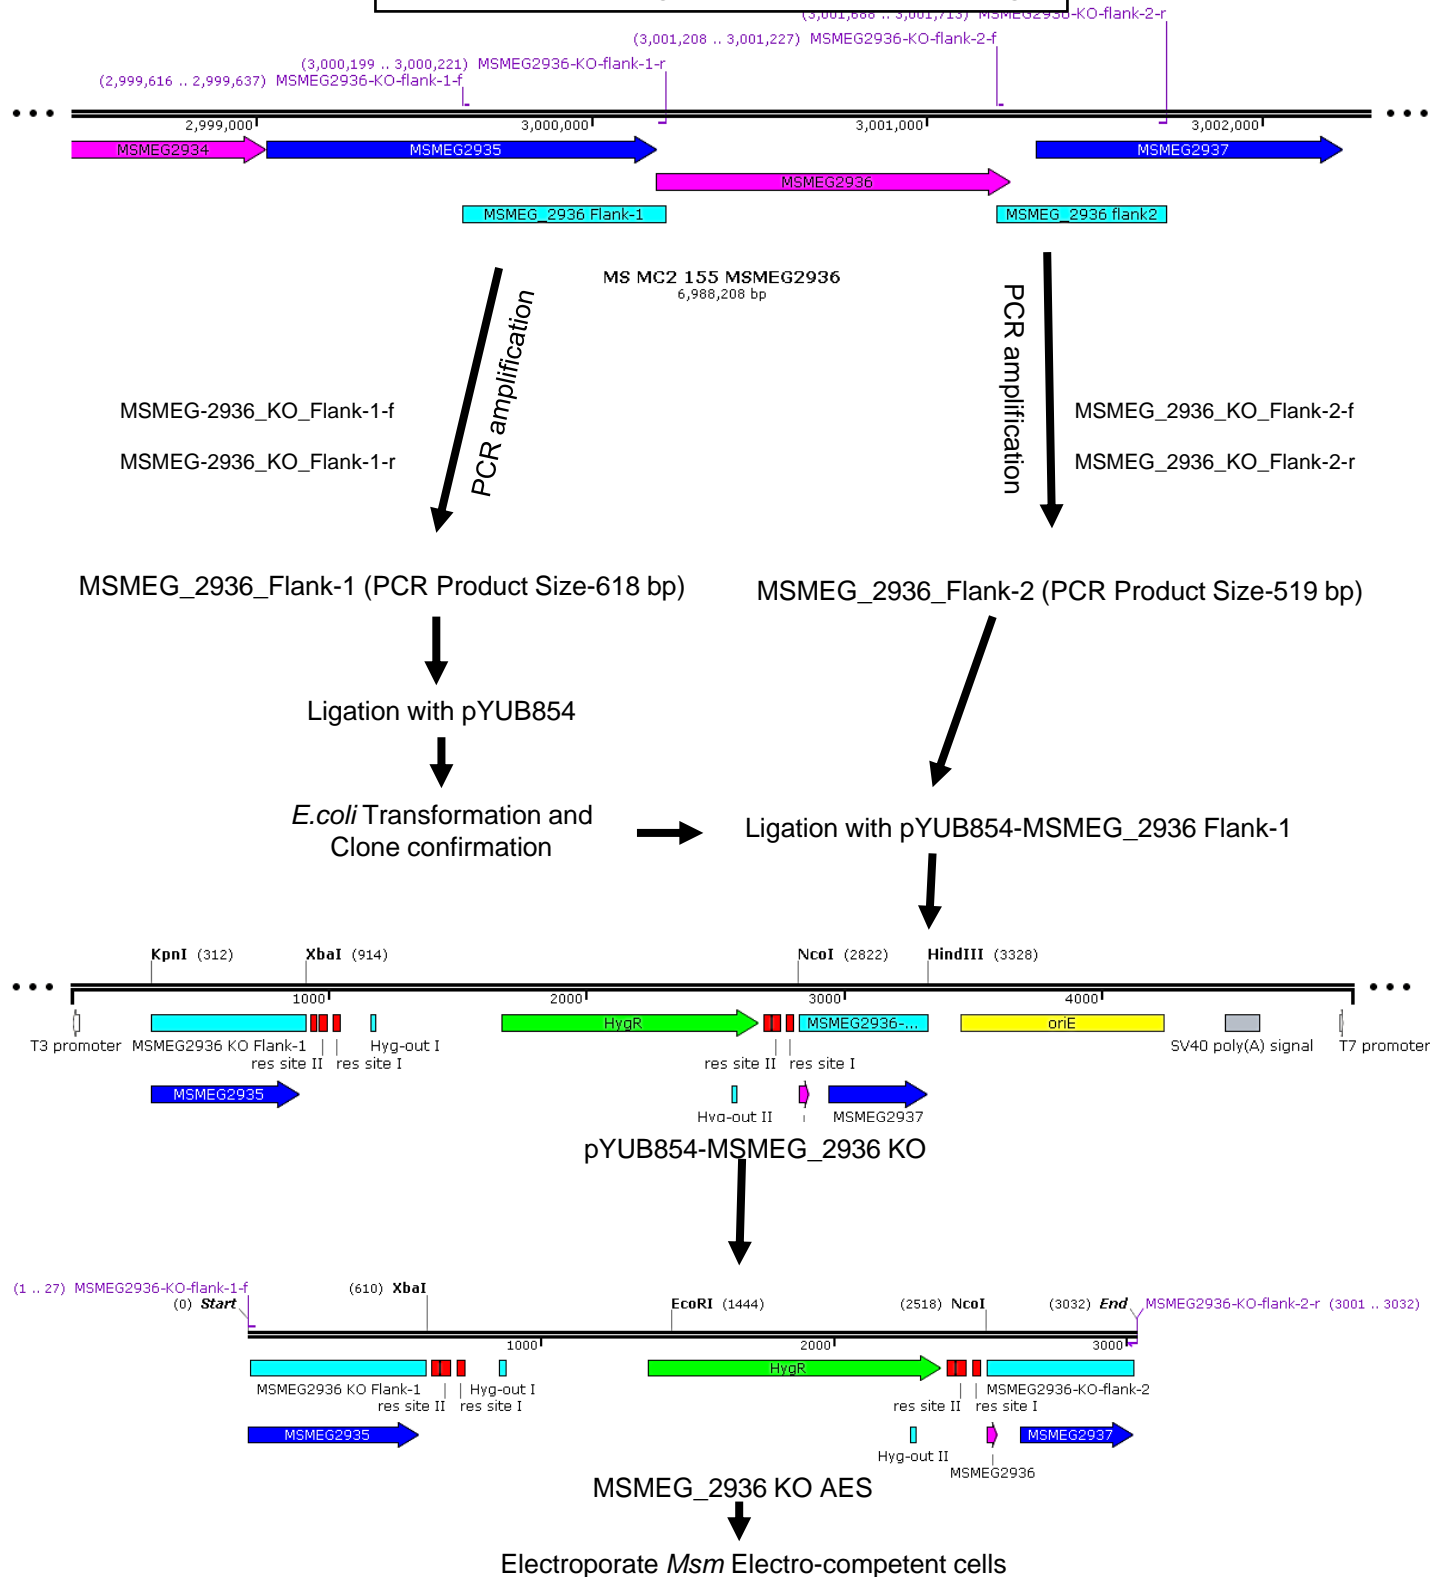

**Scheme S6. MSMEG\_2936 gene knockout strategy.** Cartoon depicts the strategy used for the MSMEG\_2936 gene allelic replacement method

**A**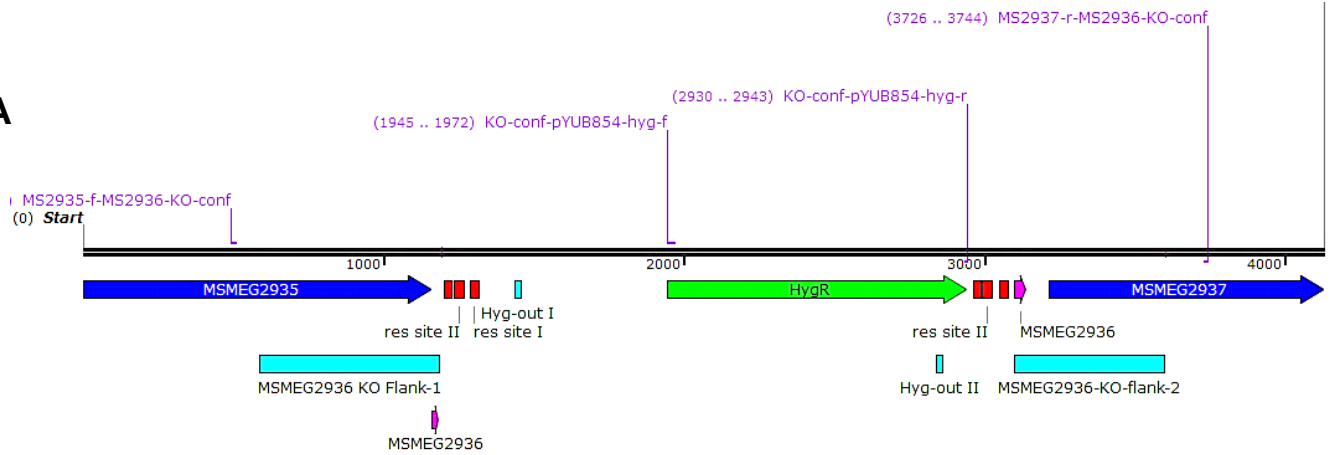**B**

- |                            |   |                              |
|----------------------------|---|------------------------------|
| 1. Ms2935-f-Ms2936-KO-conf | } | 1. PCR Product Size- 2450 bp |
| 2. KO-conf-pYUB854-hyg-r   |   | 3. PCR Product Size- 999 bp  |
| 3. KO-conf-pYUB854-hyg-f   | } | 2. PCR Product Size- 1800 bp |
| 4. Ms2937-r-Ms2936-KO-conf |   | 4. PCR Product Size- 3032 bp |
| 5. MSMEG-2936_KO_Flank-1-f | } |                              |
| 6. MSMEG-2936_KO_Flank-2-r |   |                              |

**C**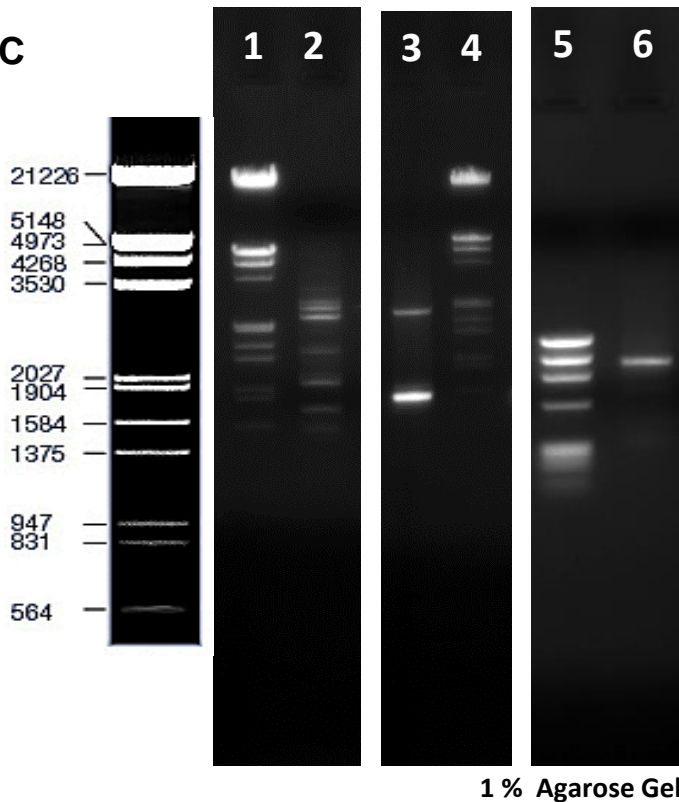**D**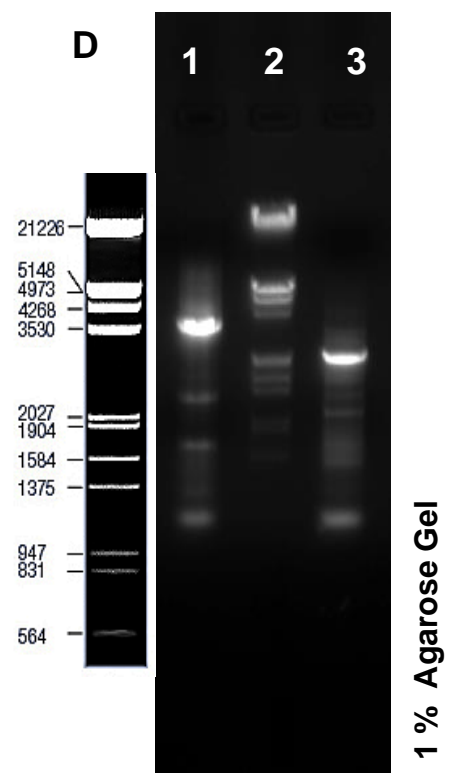

**Scheme S7. *Msm* MSMEG\_2936 KO clone confirmation using PCR and genomic DNA.**

(A) Cartoon depicts the *MSMEG\_2936* gene allelic exchange insert and its PCR Primers for clone confirmation. (B) Primers pairs and its respective PCR product details. (C) Agarose gel image showing the expected results. Lane-1 and 4 Lambda DNA EcoRI/HindIII-Marker-3, Lane 2 PCR Primer set 1, Lane 3 Primer set 2, Lane 6 Primer set 3, Lane 5  $\phi$ X174 DNA/BsuRI (HaeIII) ,Marker-9. (D) Agarose gel image for Primer set 4 Lane 1 PCR with *Msm* *MSMEG\_2936* KO gDNA, Lane-2 Lambda DNA EcoRI/HindIII-Marker-3, Lane 3 PCR with *Msm* Wild type gDNA control.



**Table S1. Bacterial strains and plasmids**

| Bacterial strains and plasmids                       | Purpose                                                                              | Reference  |
|------------------------------------------------------|--------------------------------------------------------------------------------------|------------|
| <b>Bacterial strains</b>                             |                                                                                      |            |
| <i>Mycobacterium smegmatis</i> mc <sup>2</sup> 155   | Experimental system                                                                  | [1]        |
| <i>Escherichia coli</i> JM109                        | Cloning host                                                                         | [2]        |
| <i>Escherichia coli</i> JC10289                      | Cloning host                                                                         | [3]        |
| <i>Msm</i> MSMEG_2932 KO                             | Experimental system                                                                  | This study |
| <i>Msm</i> MSMEG_2932 KO-w/o pJV53                   | Experimental system                                                                  | This study |
| <i>Msm</i> MSMEG_2932 KO-w/o pJV53-pMV306            | Experimental system, vector control for <i>Msm</i> MSMEG_2932 KO                     | This study |
| <i>Msm</i> MSMEG_2932 KO-w/o pJV53-pMV306-MSMEG_2932 | Experimental system, genome integrant complement system for <i>Msm</i> MSMEG_2932 KO | This study |
| <i>Msm</i> MSMEG_2933 KO                             | Experimental system                                                                  | This study |
| <i>Msm</i> MSMEG_2933 KO-w/o pJV53                   | Experimental system                                                                  | This study |
| <i>Msm</i> MSMEG_2933 KO-w/o pJV53-pMV306            | Experimental system, vector control for <i>Msm</i> MSMEG_2933 KO                     | This study |
| <i>Msm</i> MSMEG_2933 KO-w/o pJV53-pMV306-MSMEG_2933 | Experimental system, genome integrant complement system for <i>Msm</i> MSMEG_2933 KO | This study |
| <i>Msm</i> MSMEG_2936 KO                             | Experimental system                                                                  | This study |
| <i>Msm</i> MSMEG_2936 KO-w/o pJV53                   | Experimental system                                                                  | This study |
| <i>Msm</i> MSMEG_2936 KO-w/o pJV53-pMV306            | Experimental system, vector control for <i>Msm</i> MSMEG_2936 KO                     | This study |
| <i>Msm</i> MSMEG_2936 KO-w/o pJV53-pMV306-MSMEG_2936 | Experimental system, genome integrant complement system for <i>Msm</i> MSMEG_2936 KO | This study |
|                                                      |                                                                                      |            |

| Plasmids                       |                                                                                      |            |
|--------------------------------|--------------------------------------------------------------------------------------|------------|
| pJV53                          | Plasmid containing Che9c genes 60-61 under control of acetamidase promoter in pLAM12 | [4]        |
| pYUB854                        | <i>hyg</i> <sup>R</sup> cassette flanked by $\gamma\delta$ -res sites and 2 MCSs     | [5]        |
| pYUB854- <i>MSMEG</i> _2932-KO | 560 bp upstream and 500 bp downstream of <i>MSMEG</i> _2932 gene in pYUB854          | This study |
| pYUB854- <i>MSMEG</i> _2933-KO | 618 bp upstream and 519 bp downstream of <i>MSMEG</i> _2932 gene in pYUB854          | This study |
| pYUB854- <i>MSMEG</i> _2936-KO | 600 bp upstream and 500 bp downstream of <i>MSMEG</i> _2932 gene in pYUB854          | This study |
| pBS-KS                         | Cloning/Sequencing vector                                                            | [6]        |
| pMV306                         | Integration vector                                                                   | [7]        |
| pMV306- <i>MSMEG</i> _2932     | Integration vector                                                                   | This study |
| pMV306- <i>MSMEG</i> _2933     | Integration vector                                                                   | This study |
| pMV306- <i>MSMEG</i> _2936     | Integration vector                                                                   | This study |

*hyg*<sup>R</sup> is hygromycin resistant

### Supplementary References

1. Snapper, S.B.; Melton, R.E.; Mustafa, S.; Kieser, T.; Jacobs, W.R. Jr. Isolation and characterisation of efficient plasmid transformation mutants of *Mycobacterium smegmatis*. *Mol Microbiol* **1990**, *4*, 1911-1919.
2. Yanisch-Perron, C.; Vieira, J.; Messing, J. Improved M13 phage cloning vectors and host strains: nucleotide sequences of the M13mp18 and pUC19 vectors. *Gene* **1985**, *33*, 103-119.

3. Csonka, L.N.; Clark, A.J. Deletions generated by the transposon Tn10 in the *srl recA* region of the *Escherichia coli* K-12 chromosome. *Genetics* **1979**, *93*, 321-343.
4. van Kessel, J.C.; Hatfull, G.F. Recombineering in *Mycobacterium tuberculosis*. *Nature Meth.* **2007**, *4*, 147-152.
5. Bardarov, S.; Bardarov, S. Jr.; Pavelka, M.S. Jr.; Sambandamurthy, V.; Larsen, M.; Tufariello, J.; Chan, J.; Hatfull, G.; Jacobs, W. R. Jr. Specialised transduction: an efficient method for generating marked and unmarked targeted gene disruptions in *Mycobacterium tuberculosis*, *M. bovis* BCG and *M. smegmatis*. *Microbiology* **2002**, *148*, 3007-3017.
6. Alting-Mees, M.A; Short, J.M. pBluescript II: gene mapping vectors. *Nucleic Acids Res.* **1989**, *17*, 9494.
7. Stover, C. K.; de la Cruz, V. F.; Fuerst, T. R.; Burlein, J. E.; Benson, L. A.; Bennett, L. T.; Bansal, G. P.; Young, J. F.; Lee, M. H.; Hartfull, G. F.; Snapper, S. B.; Barletta, R. G.; Jacobs, W. R. Jr. New use of BCG for recombinant vaccines. *Nature* **1991**, *351*, 456-460.

**Table S2. Oligonucleotide primers used for cDNA synthesis and real time PCR**

| <b>Name</b>                     | <b>Sequence</b>             |
|---------------------------------|-----------------------------|
| Msm-ThrS-RT-f (MSMEG_2931)      | 5' atgcaccacctgatcttccg 3'  |
| Msm-ThrS-RT-r (MSMEG_2931)      | 5' ctcacgcgtggtgtagatgt 3'  |
| Msm-ap4aP-RT-f (MSMEG_2932)     | 5' aacgtggggctcaatctcg 3'   |
| Msm-ap4aP-RT-r (MSMEG_2932)     | 5' gttgcctggtctctttcagc 3'  |
| Msm-PI-syn-RT-f (MSMEG_2933)    | 5' ggcctacgtgaagctttcca 3'  |
| Msm-PI-syn-RT-r (MSMEG_2933)    | 5' acgaagaacgagacgaccac 3'  |
| Msm-PI-acylIT-RT-f (MSMEG_2934) | 5' tgcaggctcgacttcttcgg 3'  |
| Msm-PI-acylIT-RT-r (MSMEG_2934) | 5' gtgtcgagttcgggatagacg 3' |
| Msm-PI-msylIT-RT-f (MSMEG_2935) | 5' cacgtgaagttgccggacta 3'  |
| Msm-PI-msylIT-RT-r (MSMEG_2935) | 5' ggcgatccacttcttgacct 3'  |
| Msm-2936-RT-f                   | 5' tacttcttcgtccaccgcac 3'  |
| Msm-2936-RT-r                   | 5' ccaactcggcgatcattgtc 3'  |
| Msm-16SrRNA-RT-f                | 5' gcggaatacgtagggtccg 3'   |
| Msm-16SrRNA-RT-r                | 5' ttccagtctcccctgcagta 3'  |

**Table S3. Oligonucleotide primers used for the gene replacement of *MSMEG\_2932*, *MSMEG\_2933*, and *MSMEG\_2936* with res-*hyg*<sup>R</sup>-res and confirmation**

| Sl. No. | Primer name            | Sequence (5' – 3')                     | Features                                                    |
|---------|------------------------|----------------------------------------|-------------------------------------------------------------|
| 1       | MSMEG-2932-KO-flank1-f | ggggtaccatccaccgcgcctgt                | PCR amplification of 560 bp upstream to <i>MSMEG_2932</i>   |
| 2       | MSMEG-2932-KO-flank1-r | gctctagagccgcgcttcttcacggcg            | PCR amplification of 560 bp upstream to <i>MSMEG_2932</i>   |
| 3       | MSMEG-2932-KO-flank2-f | ccgctcgagaagagaccaggcaactcttggc        | PCR amplification of 500 bp downstream to <i>MSMEG_2932</i> |
| 4       | MSMEG-2932-KO-flank2-r | ggactagtgcgccttgatgtaggagatcacctgtgagg | PCR amplification of 500 bp downstream to <i>MSMEG_2932</i> |
| 5       | MSMEG-2933-KO-flank1-f | cggggtaccagcggttgtggacgc               | PCR amplification of 618 bp upstream to <i>MSMEG_2933</i>   |
| 6       | MSMEG-2933-KO-flank1-r | tgctctagagaaagcttcacgtaggccgc          | PCR amplification of 618 bp upstream to <i>MSMEG_2933</i>   |
| 7       | MSMEG-2933-KO-flank2-f | ctagctagcaccggagacgagcgaacc            | PCR amplification of 519 bp downstream to <i>MSMEG_2933</i> |
| 8       | MSMEG-2933-KO-flank2-r | catgccatggacgaagcggcggtacagc           | PCR amplification of 519 bp downstream to <i>MSMEG_2933</i> |
| 9       | MSMEG-2936-KO-flank1-f | cggggtacccggtacgacgaaccgcgc            | PCR amplification of 600 bp upstream to <i>MSMEG_2936</i>   |
| 10      | MSMEG-2936-KO-flank1-r | tgctctagagggtgatgacgatccacaggc         | PCR amplification of 600 bp upstream to <i>MSMEG_2936</i>   |
| 11      | MSMEG-2936-KO-flank2-f | catgccatgggcgagatggctcgctcg            | PCR amplification of 500 bp upstream to <i>MSMEG_2936</i>   |

|    |                                       |                                |                                                                                                                                    |
|----|---------------------------------------|--------------------------------|------------------------------------------------------------------------------------------------------------------------------------|
| 12 | MSMEG-2936-KO-flank2-r                | cccaagcttcactgtcgatgtggttggtgt | PCR amplification of 500 bp upstream to <i>MSMEG_2936</i>                                                                          |
| 13 | Ms2931-f-<br>Ms2932-KO-conf           | tacctggagctgtccaccaagg         | Clone confirmation for <i>MSMEG_2932</i> KO                                                                                        |
| 14 | Ms2933-r-<br>Ms2932-KO-conf           | tcacggttcgctcgtctcc            | Clone confirmation for <i>MSMEG_2932</i> KO                                                                                        |
| 15 | MS2932-f-<br>MS2933-KO-conf           | gtgaccgatcctgacgagcg           | Clone confirmation for <i>MSMEG_2933</i> KO                                                                                        |
| 16 | MS2934-r-<br>MS2933-KO-conf           | cgaagaagtcgacctgcacgc          | Clone confirmation for <i>MSMEG_2933</i> KO                                                                                        |
| 17 | MS2935-f-<br>MS2936-KO-conf           | agatccccaacggtgtcgac           | Clone confirmation for <i>MSMEG_2936</i> KO                                                                                        |
| 18 | MS2937-r-<br>MS2936-KO-conf           | cgatcttgcgcatgtgcgt            | Clone confirmation for <i>MSMEG_2936</i> KO                                                                                        |
| 19 | KO-conf-<br>pYUB854-<br><i>hyg</i> -f | gtgacacaagaatccctgttacttctcg   | Confirmation for gene replacement with Hyg <sup>R</sup> in <i>MSMEG_2932</i> -KO, <i>MSMEG_2933</i> -KO, and <i>MSMEG_2936</i> -KO |
| 20 | KO-conf-<br>pYUB854-<br><i>hyg</i> -r | tcaggcgccggggg                 | Confirmation for gene replacement with Hyg <sup>R</sup> in <i>MSMEG_2932</i> -KO, <i>MSMEG_2933</i> -KO, and <i>MSMEG_2936</i> -KO |

**Table S4. Coefficient of variation (CV), a measure of the dispersion in the location of the site of constriction from the mid-cell site. (A) CV% of population undergoing SCD. (B) CV% for population undergoing ACD. (C) Geary's statistics  $w_n$ , a test of normality for the population undergoing SCD and ACD at OD 0.6, 0.8, 1.0, 1.2, 1.4, 1.6 and 1.8.**

| <b>A. CV of the population undergoing SCD</b> |             |             |           |              |              |               |               |
|-----------------------------------------------|-------------|-------------|-----------|--------------|--------------|---------------|---------------|
| <b>OD</b>                                     | <b>P D1</b> | <b>P D2</b> | <b>SD</b> | <b>CV D1</b> | <b>CV D2</b> | <b>CV% D1</b> | <b>CV% D2</b> |
| <b>0.6</b>                                    | 0.55        | 0.45        | 0.03      | 0.06         | 0.07         | 6.06          | 6.09          |
| <b>0.8</b>                                    | 0.54        | 0.46        | 0.03      | 0.05         | 0.06         | 5.24          | 6.20          |
| <b>1.0</b>                                    | 0.54        | 0.46        | 0.03      | 0.05         | 0.06         | 4.69          | 5.55          |
| <b>1.2</b>                                    | 0.54        | 0.46        | 0.03      | 0.05         | 0.06         | 4.73          | 5.55          |
| <b>1.4</b>                                    | 0.54        | 0.46        | 0.03      | 0.05         | 0.06         | 4.88          | 5.74          |
| <b>1.6</b>                                    | 0.54        | 0.46        | 0.02      | 0.05         | 0.05         | 4.53          | 5.23          |
| <b>1.8</b>                                    | 0.54        | 0.46        | 0.03      | 0.05         | 0.06         | 4.95          | 5.82          |

| <b>B. CV of the population undergoing ACD</b> |             |             |           |              |              |               |               |
|-----------------------------------------------|-------------|-------------|-----------|--------------|--------------|---------------|---------------|
| <b>OD</b>                                     | <b>P D1</b> | <b>P D2</b> | <b>SD</b> | <b>CV D1</b> | <b>CV D2</b> | <b>CV% D1</b> | <b>CV% D2</b> |
| <b>0.6</b>                                    | 0.65        | 0.35        | 0.05      | 0.08         | 0.16         | 8.39          | 15.47         |
| <b>0.8</b>                                    | 0.66        | 0.35        | 0.06      | 0.09         | 0.17         | 8.64          | 16.49         |
| <b>1.0</b>                                    | 0.64        | 0.37        | 0.06      | 0.09         | 0.16         | 9.22          | 16.11         |
| <b>1.2</b>                                    | 0.64        | 0.37        | 0.05      | 0.08         | 0.15         | 8.31          | 14.51         |
| <b>1.4</b>                                    | 0.64        | 0.36        | 0.06      | 0.09         | 0.16         | 8.74          | 15.56         |
| <b>1.6</b>                                    | 0.62        | 0.38        | 0.04      | 0.07         | 0.11         | 6.91          | 11.41         |
| <b>1.8</b>                                    | 0.62        | 0.38        | 0.05      | 0.07         | 0.12         | 7.28          | 11.84         |

**C.  $W_n$  values for the populations dividing by SCD and ACD at different OD**

| <b>OD</b>  | <b><math>W_n</math> for SCD</b> | <b><math>W_n</math> for ACD</b> |
|------------|---------------------------------|---------------------------------|
| <b>0.6</b> | 0.86                            | 0.97                            |
| <b>0.8</b> | 0.84                            | 0.96                            |
| <b>1.0</b> | 0.87                            | 0.93                            |
| <b>1.2</b> | 0.82                            | 0.90                            |
| <b>1.4</b> | 0.80                            | 0.93                            |
| <b>1.6</b> | 0.75                            | 0.94                            |
| <b>1.8</b> | 0.77                            | 0.93                            |

**Table S5. Oligonucleotide primers used for the generation of genome integrated respective wild type complemented knockout strains of *MSMEG\_2932* KO, *MSMEG\_2933* KO, and *MSMEG\_2936* KO**

| Sl. No. | Primer name             | Sequence (5' – 3')                    |
|---------|-------------------------|---------------------------------------|
| 1       | Msm-2932-Xbal-Comp-f    | gct <u>ctaga</u> acaccaacatgaaggtgccg |
| 2       | Msm-2932-HindIII-Comp-r | gaa <u>agctt</u> cacgtaggccgcgcg      |
| 3       | Msm-2933-Xbal-Comp-f    | gct <u>ctaga</u> tggggctcaatctcggct   |
| 4       | Msm-2933-EcoRI-Comp-r   | cgga <u>attcc</u> agccggccgcatac      |
| 5       | Msm-2936-Xbal-Comp-f    | gct <u>ctaga</u> gtccaccgctacgactggtc |
| 6       | Msm-2936-HindIII-Comp-r | cca <u>agctt</u> cccggctctggttgctcga  |

# Restriction enzyme recognition sites are underlined
